1 **Title: Biosurfactant production maintains viability in anoxic conditions by**  
2 **depolarizing the membrane in *Bacillus subtilis***

3

4 **Authors**

5 Heidi A. Arjes<sup>1</sup>, Lam Vo<sup>1</sup>, Caroline Marie Dunn<sup>2</sup>, Lisa Willis<sup>1</sup>, Christopher A. DeRosa<sup>3</sup>,

6 Cassandra L. Fraser<sup>3</sup>, Daniel B. Kearns<sup>2,\*</sup>, Kerwyn Casey Huang<sup>1,4,5,\*</sup>

7

8 **Affiliations**

9 <sup>1</sup>Department of Bioengineering, Stanford University School of Medicine, Stanford, CA  
10 94305, USA

11 <sup>2</sup>Department of Biology, Indiana University, Bloomington, IN 47405, USA

12 <sup>3</sup>Department of Chemistry, University of Virginia, Charlottesville, VA 22904, USA

13 <sup>4</sup>Department of Microbiology & Immunology, Stanford University School of Medicine,  
14 Stanford, CA 94305, USA

15 <sup>5</sup>Chan Zuckerberg Biohub, San Francisco, CA 94158

16

17 \*Corresponding authors: [kchuang@stanford.edu](mailto:kchuang@stanford.edu) and [dbkearns@indiana.edu](mailto:dbkearns@indiana.edu)

18 Lead author: Kerwyn Casey Huang ([kchuang@stanford.edu](mailto:kchuang@stanford.edu))

19

20 *Keywords:* surfactin, biosurfactant, oxygen depletion, cell lysis, protoplast, respiration,  
21 membrane potential, membrane energetics, LytC

## 22 **Summary**

23 The presence or absence of oxygen in the environment is a strong effector of cellular  
24 metabolism and physiology. Like many eukaryotes and some bacteria, *Bacillus subtilis* is an  
25 obligate aerobe that primarily utilizes oxygen during respiration to generate ATP. Despite  
26 the importance of oxygen for *B. subtilis* survival, we know little about how oxygen is  
27 consumed during growth and how populations respond to shifts in oxygen availability.  
28 Here, we find that when oxygen was depleted from stationary phase cultures ~90% of *B.*  
29 *subtilis* 3610 cells died and lysed due to autolysin activity; the remaining cells maintained  
30 colony-forming ability. Interestingly, the domesticated 168 strain maintained a higher  
31 optical density than 3610 during oxygen depletion due to the formation of cell-wall-less  
32 protoplasts, but the remaining, rod-shaped cells were >100-fold less viable than 3610. We  
33 discovered that the higher viability in 3610 was due to its ability to produce the  
34 antibacterial compound surfactin, as surfactin addition rescued 168 viability and also  
35 increased yield in aerobic growth. We further demonstrate that surfactin strongly  
36 depolarizes the *B. subtilis* membrane, and that other known membrane-potential  
37 disruptors restore viability to 168. These findings highlight the importance of surfactin for  
38 survival during oxygen-depleted conditions and demonstrate that antimicrobials normally  
39 considered harmful can instead benefit cells in stressful conditions when the terminal  
40 electron acceptor in respiration is limiting.

## 41 **Introduction**

42

43 Many species across all domains of life use oxygen as the terminal electron acceptor during  
44 aerobic respiration, which produces approximately ten-fold more ATP per glucose  
45 molecule than via glycolysis and fermentation in the absence of respiration. In most human  
46 cells, oxygen depletion causes exhaustion of ATP and eventual death, either through lysis  
47 caused by osmotic stress due to the inability to regulate osmolyte levels [1, 2] or through  
48 activation of signaling cascades that lead to apoptosis [3]. Thus, maintaining concentration  
49 gradients of ions across cell membranes is of paramount importance when oxygen is  
50 lacking. Like human cells, certain microbes such as the pathogen *Mycobacterium*  
51 *tuberculosis* as well as most fungi (with the exception of yeasts) [4] are considered strict  
52 aerobes due to their inability to make ATP in the absence of oxygen. Under conditions of  
53 rapidly depleted oxygen, *M. tuberculosis* cells show a loss in viability [5, 6]. The related,  
54 soil-dwelling species *Mycobacterium smegmatis* also loses viability upon oxygen depletion,  
55 and the remaining viable cells maintain the redox balance using hydrogen fermentation  
56 and activate stress response genes critical for survival [7, 8]. Despite the clinical  
57 importance of *M. tuberculosis*, surprisingly few studies have interrogated how these and  
58 other strict aerobes respond to oxygen depletion and the genes responsible for survival.

59         The Gram-positive model bacterium *Bacillus subtilis* is considered a strict aerobe  
60 when grown in the absence of nitrate or nitrite [9]. *B. subtilis* is naturally found in the soil  
61 and is used as an additive to help prevent infections and promote growth in plants [10, 11].  
62 In the soil, *B. subtilis* undergoes constant shifts in oxygen concentration, as oxygen is  
63 readily available in dry soils but diffuses less and becomes depleted in wet or flooded soils

64 following a rain [12]. Early observations of *B. subtilis* culture lysis upon a shift to anoxic  
65 environments have yet to be further characterized [13], and it remains a mystery whether  
66 *B. subtilis* has strategies to cope with oxygen limitation.

67 *B. subtilis* has long been domesticated in the lab, leading to a multitude of genetic  
68 tools, strain libraries, and online databases and resources [14-16]. The high level of genetic  
69 relatedness between biofilm-forming “wild” strains and derivative non-biofilm-forming  
70 laboratory strains has been exploited to identify genetic differences that underlie biofilm  
71 community behaviors [17]. For instance, the commonly studied laboratory strain 168,  
72 which is derived from the biofilm-forming strain 3610, lacks an extrachromosomal plasmid  
73 and harbors several point mutations that reduce or abolish social behaviors such as matrix  
74 production [18]. Notably, 3610 produces the small molecule surfactin, a powerful  
75 surfactant that has previously been implicated in swarming motility [19-21]. Surfactin has  
76 also been shown to kill fungi [22] and some bacteria *in vitro* [22-26]. However, fitness  
77 benefits of surfactin production in the context of planktonic cultures have yet to be  
78 identified, although some surfactants can accelerate oxygen diffusion through the air-water  
79 interface [27].

80 Here, we characterize the interplay between oxygen availability and surfactin  
81 production during the growth and death of *B. subtilis* cultures. We show that oxygen  
82 becomes limiting in the culture during the transition to stationary phase and that surfactin  
83 secretion improves growth yield in stationary phase by increasing oxygen availability.  
84 During a shift to anoxic conditions, we demonstrate that the majority of *B. subtilis* cells die  
85 and lyse due to the activity of the LytC autolysin and surfactin. Finally, we discover that

- 86 surfactin maintains the viability of the remaining cells by causing membrane
- 87 depolarization that allows these cells to survive until oxygen is restored.

## 88 **Results**

89

### 90 **Oxygen depletion leads to rapid death and lysis of most *B. subtilis* cells**

91 When culturing the biofilm-forming *B. subtilis* strain 3610 in LB, we noticed that once a test  
92 tube containing a late exponential culture was shifted from a shaking incubator to a  
93 stationary rack on the bench, the opacity of the tube decreased continuously over a period  
94 of 10 hours, suggesting that cells were dying and lysing (Fig. 1A). Consistent with lysis,  
95 microscopic observation of cultures left to sit on the bench for 10 hours revealed  
96 substantial phase-gray cell remnants in addition to phase-dark rod-shaped cells (Fig. 1A).  
97 We conclude that *B. subtilis* 3610 cultures exhibit death and lysis during static incubation  
98 after cessation of rapid growth.

99         The static culture would be limited in oxygen diffusion, and as *B. subtilis* is a strict  
100 aerobe that relies on its use of oxygen as a terminal electron acceptor during respiration,  
101 we hypothesized that the death in the culture was due to oxygen limitation. To measure  
102 oxygen levels during oxygen growth and depletion, we added phosphorescent oxygen-  
103 sensitive nanoparticles (Methods) to cell cultures in microtiter plates and measured optical  
104 density (OD) and light emission over time. To establish a controlled environment, we grew  
105 cultures in sealed 96-well microtiter plates with a hole poked in the seal to allow oxygen  
106 exchange, or limited oxygen by completely sealing the wells (Fig. 1B, top); we utilized  
107 linear shaking to prevent an oxygen gradient in the culture. In media without cells, oxygen  
108 initially diffused into the media due to shaking, and then remained at an approximately  
109 constant value (Fig. 1B, bottom). In media with cells, oxygen levels initially increased (again  
110 due to shaking) but then began to decrease when the culture reached an  $OD_{600} \sim 0.05$ ,

111 indicating that the cells were consuming the oxygen faster than it dissolved into the media  
112 (Fig. 1B). When cultures reached an  $OD_{600} \sim 0.5$ , oxygen levels were undetectable but the  
113 culture continued to grow (Fig. 1B), presumably because the cells rapidly consumed any  
114 oxygen that dissolved into the media.

115         When the cultures reached an  $OD_{600} \sim 0.8$ , we sealed the wells to abolish oxygen  
116 exchange in the headspace, and returned the cultures to a shaking environment. As  
117 expected, the measured oxygen levels in the cultures remained low (Fig. 1B, lower right).  
118 Within 2 hours, the  $OD_{600}$  began to decrease, reminiscent of our observations of OD loss in  
119 standing test tubes (Fig. 1A), and plateaued at  $\sim 0.1$  after 48 h (Fig. 1B, upper right).  
120 Consistent with the OD drop upon sealing the well, cell viability (defined here as the ability  
121 of a cell to form a colony on an agar plate) dropped approximately ten-fold after 48 h (Fig.  
122 1C). These observations suggest that the loss of OD in standing tubes and in agitated sealed  
123 plates was due to cell lysis during oxygen depletion.

124         To further explore the correlation between cell lysis and oxygen depletion, we  
125 investigated the effect of cell density on hypoxia-induced cell lysis by growing cultures  
126 aerobically to different optical densities prior to sealing the wells. Regardless of starting  
127 culture density ( $OD_{600}$  from 0.4 to 0.8), the  $OD_{600}$  either stayed approximately constant or  
128 increased slightly for  $\sim 1$  hour after sealing, and then the cultures exhibited large decreases  
129 in OD over time (Fig. 1D, S1A). The maximum lysis rate (the absolute value of the most  
130 negative slope of the  $\ln(OD_{600})$  curve) increased with increasing starting OD, such that the  
131 cultures that began at the highest density ( $OD_{600} \sim 0.8$ ) had a lysis rate of 40% decrease per  
132 hour (Fig. 1D). Since the lysis behavior varied with initial OD, we standardized all further  
133 experiments by growing 3610 cells to an  $OD_{600}$  of  $\sim 0.9$ -1.1 before cutting off oxygen

134 exchange. Transfer of OD~1 cultures into an anaerobic chamber resulted in an even higher  
135 maximum lysis rate of 86% decrease per hour (Fig. S1B). From these data, we infer that  
136 populations at high density deplete the remaining oxygen more rapidly, and that rapid  
137 oxygen depletion more readily triggers cell lysis.

138

### 139 **A cell wall autolytic enzyme is necessary for lysis of non-viable cells upon oxygen** 140 **depletion**

141 In addition to losing viability upon oxygen depletion, the non-viable population also lysed  
142 and was removed from the population of intact cells, as indicated by the substantial  
143 decrease in optical density. Given the importance of the cell wall for maintaining cellular  
144 integrity in bacteria, we hypothesized that this lysis involves the activity of cell wall  
145 autolytic enzymes. Cell wall growth requires both insertion of new material and cleavage of  
146 the existing peptidoglycan by autolysins [28]. In *B. subtilis*, the major autolysin LytC is  
147 under control of the vegetative sigma factor  $\sigma^A$  and the alternative sigma factor  $\sigma^D$  [29, 30],  
148 preventing the unchecked breakdown of the cell wall when insertion is disrupted [31]. We  
149 measured the OD of a  $\Delta$ lytC 3610 mutant and found that the mutant exhibited reduced lysis  
150 upon oxygen depletion (Fig. 1C). As a specificity control, deletion of another  $\sigma^D$ -dependent  
151 autolysin LytD phenocopied wild-type behavior (Fig. S1C), suggesting that LytC is the  
152 primary autolysin activated in oxygen-depleted conditions. Despite the higher biomass in  
153 the  $\Delta$ lytC cultures after oxygen depletion, a similar proportion of cells (~10%) retained  
154 viability as in wild-type cultures (Fig. 1C). Single-cell imaging of the oxygen-depleted  
155 cultures revealed mixed populations of rod-shaped cells, some of which were phase-gray  
156 “ghosts” and others that were phase dark (Fig. 1C). Time-lapse microscopy demonstrated



157 that only a portion of the phase-dark rod-shaped  $\Delta\text{lytC}$  cells were capable of resuming  
158 growth (Fig. S1D, movie S1, S2), consistent with our plating efficiency data (Fig. 1C). These  
159 data indicate that lysis and cell viability are genetically separable phenotypes, since many  
160  $\Delta\text{lytC}$  mutant cells remain intact yet still lose viability. Thus, since LytC degrades the cell  
161 wall but does not impact the viability of 3610 cultures upon oxygen depletion, we conclude  
162 that lysis is downstream of viability loss during oxygen depletion.

163

164 **Laboratory-domesticated *B. subtilis* strains exhibit more viability loss despite**  
165 **reduced lysis upon oxygen depletion**

166 *B. subtilis* strain 168, a genetic derivative of 3610, is commonly used in research  
167 laboratories as it was selected for dispersed growth in culture and improved genetic  
168 tractability [17]. In microtiter plate assays, we found that upon oxygen depletion the OD of  
169 168 cultures decreased at a lower rate and remained at a higher level throughout 48 h of  
170 monitoring (Fig. 2A). Imaging of oxygen-depleted 168 cultures revealed the presence of  
171 round cells in addition to rod-shaped cells (Fig. 2B). Some round cells were intact and did  
172 not stain with propidium iodide (PI), while others had compromised membranes and thus  
173 stained brightly with PI (Fig. 2B). In cell cultures that were first stained with fluorescent D-  
174 amino acids (FDAAs) to label cell walls, the vast majority of the rounded cells did not retain  
175 FDAA staining, indicating that they were protoplasts without cell walls (Fig. S2A). Indeed, a  
176 168  $\Delta\text{lytC}$  strain did not form round cells and exhibited less lysis (Fig. S2B), indicating that  
177 the protoplasts released in 168 are more fragile than their walled counterparts. Thus, we  
178 conclude that LytC activity during oxygen depletion degrades the cell wall in 168, releasing

179 membrane-bound protoplasts that account for the higher OD in 168 cultures compared  
180 with 3610 cultures.

181         Despite having a higher OD<sub>600</sub> than 3610 cultures, the colony-forming units (CFU) in  
182 168 cultures depleted of oxygen for 24 h decreased ~100-fold relative to 3610 (Fig. 2C).  
183 Indeed, time-lapse imaging on fresh medium with oxygen showed that despite having  
184 intact cell envelopes, only ~1% of the rod-shaped 168 cells were able to grow and divide,  
185 whereas ~95% of the 3610 cells exhibited growth (Fig. S2C, Movie S3,S4). We never  
186 observed growth either in increased cell number or increased cell size during 12 h time-  
187 lapse imaging of any of the protoplasts on fresh LB or on filtered spent medium, suggesting  
188 that the protoplasts formed in strain 168 are not viable. We conclude that despite reduced  
189 cell lysis, 168 cultures experience a much more drastic loss of viability upon oxygen  
190 depletion.

191

### 192 **Surfactin increases lysis and restores viability to the domesticated strain 168**

193 Strains 3610 and 168 differ in a number of chromosomal loci, and 168 is defective in  
194 phenotypes related to secretion of extracellular products that support multicellular  
195 behaviors such as biofilm formation and swarming motility [18]. To determine whether  
196 extracellular products were responsible for the oxygen-related phenotypic differences  
197 between the two strains, we subjected a 1:1 volumetric mixture of the strains to oxygen  
198 depletion. The viability of 168 (which has a colony morphology visually distinct from that  
199 of 3610) increased dramatically in the co-culture (Fig. 4C). A candidate compound that  
200 could restore viability to 168 is surfactin, which is a strong surfactant that creates K<sup>+</sup>-  
201 permeable pores and solubilizes lipid bilayer vesicles *in vitro* [32]. Surfactin is produced by

202 3610 but not 168, due to a mutation in *sfp*, which encodes an enzyme necessary to activate  
203 the surfactin biosynthesis complex [19]. We found that exogenous surfactin addition at  
204 either the time of inoculation of the culture or at the initiation of oxygen depletion  
205 increased the lysis rate of 168 and eliminated protoplasts (Fig. 2D,E), consistent with  
206 surfactin-induced protoplast lysis.

207 Remarkably, exogenous surfactin addition restored the viability of oxygen-depleted  
208 168 cultures to similar levels as 3610 (Fig. 2F). Moreover, a 168 strain with *sfp* genetically  
209 complemented to restore surfactin production phenocopied the surfactin-treated 168  
210 cultures in terms of lysis, cell morphology, and viability (Fig. 2F, S2). Thus, we conclude  
211 that surfactin production both promotes protoplast lysis and maintains viability in oxygen-  
212 depleted *B. subtilis* cultures.

213

## 214 **Surfactin improves growth yield of the domesticated strain 168 by increasing oxygen** 215 **diffusion**

216 One intriguing distinction between the aerobic growth of 3610 and 168 was the divergence  
217 of the growth curves around  $OD_{600} \sim 0.3$ ; after this point, 3610 cultures completed another  
218  $\sim 1.5$  mass doublings to reach  $OD_{600} \sim 0.9$ , while 168 cultures underwent only 1 mass  
219 doubling to reach  $OD_{600} \sim 0.6$  over the same period (Fig. 3A). We noted that a surfactin-  
220 supplemented culture experienced more growth after the OD reached  $\sim 0.3$  than untreated  
221 cultures, resulting in a higher overall yield similar to that of 3610 (Fig. 3B). When surfactin  
222 was added just prior to the divergence in growth curves, the yield was similarly restored  
223 (Fig. 3B). Thus, we inferred that surfactin production was responsible for the increase in  
224 yield of 3610 relative to 168. The detergent Tween 80 similarly increased growth yield in

225 168 cultures (Fig. 3C), indicating that the detergent properties of surfactin were likely  
226 responsible for the increased yield.

227 Certain compounds have the ability to increase oxygen diffusion in liquid [33], and it  
228 has been proposed that oxygen diffusivity is rate-limiting for the function of some  
229 biological systems [34]. To test whether surfactin increased oxygen in the media, we used  
230 our oxygen nanoprobe to compare oxygen levels in 168 cultures with and without added  
231 surfactin. We found that exogenous surfactin increased the oxygen levels in cultures during  
232 late-exponential phase, when oxygen would normally be depleted lower than our limit of  
233 detection (Fig. 3D). A similar increase occurred due to addition of Tween 80 (Fig. 3D). A  
234 biophysical model incorporating diffusion and cellular consumption of oxygen predicted  
235 that the observed ~1.2-fold increase in peak oxygen level is consistent with a ~1.4-fold  
236 increase in diffusion rate (Methods). Thus, we infer that the presence of surfactin results in  
237 higher growth yield due to the enhanced availability of oxygen during the transition to  
238 stationary phase when oxygen would otherwise be limiting for growth.

239

#### 240 **A transposon screen supports surfactin production as the main determinant of** 241 **survival upon oxygen depletion**

242 Given the large decreases in viability after 24 h of oxygen depletion, we performed a  
243 genetic screen to attempt to identify any mutations that would increase the survival of 168  
244 and 3610 without oxygen. We made 20-30 independent transposon libraries of 5000-  
245 10,000 individual transposon mutants per library in each background and subjected these  
246 libraries to oxygen depletion, hypothesizing that any mutants with enhanced survival  
247 would be enriched (Fig. S3A). We could not identify any such 168 mutants, suggesting that

248 there is not an easily obtainable loss-of-function mutant in a surfactin-independent  
249 pathway to increase viability upon oxygen depletion.

250 We identified two categories of mutants in the 3610 background with decreased  
251 lysis upon oxygen depletion: surfactin production (*comA*, *comP*, *srfAA*, and a hit upstream of  
252 *rghR* (*rghR<sub>us</sub>*)) and flagella-related (*fliI*, *fliJ*, and *fliF*) (Fig. S3B, Table S1). *srfAA* encodes the  
253 surfactin synthetase subunit A, which is part of the enzyme that synthesizes surfactin (Fig.  
254 4A) [19, 35]. ComA and ComP form a two-component system that activates surfactin  
255 production at high cell density [36]. RghR regulates RapG and RapH, two repressors of the  
256 *srfA* operon (Fig 4A) [37]. The flagella-related mutants disrupted *fliI* and *fliJ*, which encode  
257 accessories of the flagellar type III secretion apparatus, and *fliF*, which encodes the flagellar  
258 basal ring [38-41]. In-frame markerless deletions of these mutants had ~4-fold lower  
259 viability than the parent after 24 h of oxygen depletion (Fig. S3C), which we hypothesized  
260 was due to the surfactin in the pooled library cultures increasing their survival advantage  
261 in the mixed population but not in isolation. Indeed, upon exogenous surfactin addition, all  
262 mutants responded with increased lysis and removal of protoplasts/cell debris (Fig. 4B,C,  
263 S3D). Taken together, the fact that we obtained no hits that increased viability in a 168  
264 background and that all hits in a 3610 background are directly related to surfactin  
265 production or respond to surfactin points to surfactin as the primary determinant of  
266 viability in the absence of oxygen.

267

### 268 **Surfactin restores viability by depolarizing the membrane**

269 *In vitro*, surfactin creates potassium ion-permeable pores in lipid bilayers [32]. If this  
270 behavior occurs *in vivo*, such pores would reduce the strength of the potassium ion

271 gradient across the cell membrane and alter membrane potential. Thus, we tested the  
272 energetic state of cells after various chemical treatments using the membrane potential-  
273 sensitive dyes DiSC<sub>3</sub>(5) and ThT [42, 43]. DiSC<sub>3</sub>(5) is taken up by cells and the fluorescence  
274 signal is initially quenched. Agents that depolarize cells release DiSC<sub>3</sub>(5) into the medium,  
275 resulting in an increased signal [42]. By contrast, ThT enters cells with polarized  
276 membranes and fluoresces inside the cell; upon depolarization, ThT exits the cells and the  
277 fluorescence is reduced [43]. As expected, we found that treatment of 168 cells with  
278 valinomycin, a known depolarizing agent that functions as a potassium-specific transporter  
279 [44], led to an increase in DiSC<sub>3</sub>(5) and a decrease in ThT signal (Fig. 5A). CCCP, a proton  
280 ionophore that dissipates the proton motive force [45], strongly reduced the ThT signal  
281 and slightly increased DiSC<sub>3</sub>(5) fluorescence (Fig. S4). Surfactin treatment led to a large  
282 increase in DiSC<sub>3</sub>(5) fluorescence and a greater decrease in ThT fluorescence than  
283 valinomycin (Fig. 5A), demonstrating that surfactin can strongly depolarize *B. subtilis* cells.

284         Based on these findings, we hypothesized that de-energizing the membrane would  
285 be sufficient to rescue the colony-forming ability of 168 cultures upon oxygen depletion.  
286 Indeed, valinomycin and CCCP both restored viability to a similar extent as surfactin (Fig.  
287 5B). Interestingly, valinomycin- and CCCP-treated cultures had protoplasts after 24 h of  
288 oxygen depletion, consistent with surfactin being necessary for protoplast lysis and  
289 indicating that protoplast formation is independent from viability maintenance. Taken  
290 together, these data indicate that membrane potential dictates the ability of *B. subtilis* cells  
291 to survive oxygen depletion.

## 292 **Discussion**

293

294 While surfactin has been recognized to promote swarming motility and complex colony  
295 architecture in *B. subtilis* communities such as biofilms [18, 46], its role in planktonic  
296 cultures has remained mysterious. Here, we demonstrate three independent roles of  
297 surfactin in planktonic cultures. During aerobic growth, the detergent properties of  
298 surfactin increase growth yield by increasing the oxygen available to cells entering  
299 stationary phase (Fig. 3). During oxygen depletion, surfactin plays two independent roles:  
300 (1) it works in tandem with LytC to remove non-viable cells from the culture (Fig. 2), and  
301 (2) it depolarizes the remaining cells and thereby maintains their viability during oxygen  
302 depletion (Fig. 5).

303 The increase in growth yield due to surfactin suggests that oxygen is limiting even in  
304 aerobic cultures and that increasing oxygen availability can increase yield. This finding has  
305 industrial implications as *B. subtilis* is commonly used to produce many biological  
306 compounds such as enzymes and antibiotics [47], and maintaining oxygen levels are critical  
307 to optimize production of the desired compound [48, 49]. If this oxygen-related growth  
308 yield enhancement holds across species, detergent addition may increase bioproduction in  
309 other commonly utilized organisms such as *Streptomyces* species, which are used to  
310 isolate numerous antibiotics, and the industrial powerhouse *Escherichia coli*, which is  
311 widely used to synthesize many biopharmaceuticals such as insulin [47]. In addition to  
312 oxygen, surfactin may also facilitate growth by increasing nutrient diffusion to cells during  
313 late exponential phase when nutrients become limiting.

314 We also found that surfactin has at least two functions during oxygen starvation that  
315 are distinct from its role during aerobic growth. Surfactin causes lysis in cells that  
316 experience LytC-mediated cell wall degradation (Fig. S2), presumably through membrane  
317 disruption. Moreover, surfactin maintains viability of the remaining intact cells through  
318 membrane depolarization, which may allow these cells to enter a metabolically inactive  
319 state where they can ride out the stress of the oxygen depletion. While it was formally  
320 possible that cell lysis helped maintain viability of the remaining cells, the observations  
321 that  $\Delta lytC$  mutants have the same viability as wild-type cultures even though the non-viable  
322 cells remain intact (Fig. 1C) and that CCCP or valinomycin treatment of 168 cultures  
323 rescues viability without removing protoplasts (Fig. 5C) demonstrate that surfactin  
324 maintains viability by acting directly upon the membrane potential of the surviving cells.

325 Generally, OD is used as a proxy for cell number, which holds true for our  
326 measurements of 3610 cultures undergoing oxygen depletion as the 10-fold drop in OD  
327 measured reflects cell lysis and quantitatively mirrors the decrease in viability (Fig. 1C).  
328 However, our work highlights instances during oxygen depletion when biomass measured  
329 by OD is uncoupled from viability: both  $\Delta lytC$  3610 cells and 168 cells remain intact and the  
330 cultures have a relatively high OD compared with wild-type 3610, but most cells cannot  
331 form colonies (Fig. 2C, S1C). This uncoupling between OD and viability has been observed  
332 previously in cell-cycle mutants where cells remain intact and metabolically active but  
333 cannot divide and form colonies [51], and may be more prevalent than is currently  
334 appreciated, motivating future studies that rely on OD to perform assays to verify culture  
335 viability.



336           Since cell depolarization can actually improve the viability of cells undergoing  
337 oxygen depletion, under conditions with limiting terminal electron acceptors, certain  
338 antibacterial treatments that inhibit growth may actually keep cells viable. Such a  
339 possibility needs to be taken into consideration when treating bacterial infections and  
340 removing bacteria in low-oxygen clinical and industrial settings, particularly those in which  
341 the microbe primarily gains energy through aerobic respiration and hence the terminal  
342 electron acceptor may be limiting. Moreover, it remains generally unclear which  
343 antimicrobial treatments will disrupt membrane potential as a side effect of their primary  
344 activity or mechanistically how antibiotic treatments affect cells in low oxygen  
345 environments, motivating further studies of membrane energetics during growth-  
346 inhibition.

347           The cell-wall breakdown of *B. subtilis* cells during oxygen depletion provides further  
348 support for a recently discovered regulatory role of membrane potential in cell-wall  
349 synthesis [52]. Indeed, LytC is activated upon sodium azide treatment that deprotonates  
350 the cell wall [53, 54] and the activity of peptidoglycan synthesis enzymes in *E. coli* are  
351 regulated by pH [55, 56]. In addition, the recent observation that actively growing and  
352 dormant cells in a *B. subtilis* culture respond oppositely to an electrical pulse wherein they  
353 either hyperpolarize or depolarize, respectively [57], suggests that membrane energetics  
354 may explain the observed population heterogeneity in our oxygen-depleted 3610 cultures.  
355 Thus, as membrane potential is of utmost importance in metabolism and cell growth, is  
356 becoming more appreciated in regulating cell-wall remodeling, and likely feeds back into  
357 many additional aspects of cell physiology, bacteria must employ strategies to maintain  
358 and/or modulate membrane potential during changing environmental conditions. The

359 ability of surfactin to both alter membrane energetics to maintain viability during oxygen-  
360 depletion and to enhance growth in oxygen-limited conditions has likely provided multiple  
361 fitness advantages to *B. subtilis* in spatially structured and complex environments such as  
362 native soil communities, and strategies for regulating membrane potential may be an  
363 important factor for survival of other strict aerobes as well.

364 **Methods**

365

366 **Media and growth conditions**

367 All strains and their genotypes are listed in Table S2. Strains were grown in LB (Lennox  
368 broth with 10 g/L tryptone, 5 g/L NaCl, and 5 g/L yeast extract). Antibiotics for selection of  
369 mutant strains were used as follows: kanamycin (5 µg/mL), MLS (a combination of  
370 erythromycin at 0.5 µg/mL and lincomycin at 12.5 µg/mL), chloramphenicol (5 µg/mL),  
371 and spectinomycin (100 µg/mL). Surfactin was added at a final concentration of 0.05  
372 mg/mL unless otherwise noted. Strains were cultured either in 5 mL of medium in a test  
373 tube on a roller drum or in 200 µL of medium in a 96-well plate in a Biotek Epoch2  
374 spectrophotometer under linear shaking (shaking was set to 567 cycles per minute (cpm),  
375 3-mm magnitude of shaking). For all experiments, the initial inoculum was from a fresh  
376 colony struck from a -80 °C freezer stock onto LB 1.5% agar plates and incubated overnight  
377 at 37 °C.

378

379 **Strain construction**

380 Strains were constructed using SPP1 phage transduction [58]. The donor strain was grown  
381 for >6 h in TY medium (LB supplemented with 0.01 M MgSO<sub>4</sub> and 0.1 mM MnSO<sub>4</sub> after  
382 autoclaving). Ten-fold dilutions of SPP1 phage were added to the culture and 3 mL TY soft  
383 (0.5%) agar was mixed with the culture/phage mixture and poured over a TY plate (1.5%  
384 agar) overnight. A plate was chosen that exhibited nearly total clearing of cells without a  
385 large number of phage-resistant mutants. Five milliliters of TY medium were added to this  
386 plate and a 1-mL filter tip was used to scrape up the soft agar. This soft agar/liquid mix was

387 filtered through a 0.4- $\mu$ m filter. The phage was added to a stationary-phase (grown for 6-10  
388 h) culture in TY medium of the recipient strain (10  $\mu$ L undiluted phage + 100  $\mu$ L recipient  
389 cells, and optionally 900  $\mu$ L TY medium) and incubated at 37 °C for 30 min, then plated  
390 onto LB + antibiotic and 0.01 M sodium citrate (sodium citrate was omitted for MLS  
391 selection). Plates were incubated for 24 h and transductants were struck for single colonies  
392 to eliminate the phage.

393 To generate the  $\Delta$ *lytC* in-frame marker-less deletion construct, the region upstream  
394 of *lytC* was PCR-amplified using the primer pair 1427/1428 and digested with Sall and  
395 EagI, and the region downstream of *lytC* was PCR-amplified using the primer pair  
396 1425/1426 and digested with EagI and BamHI. The two fragments were then  
397 simultaneously ligated into the Sall and BamHI sites of pMiniMAD, which carries a  
398 temperature-sensitive origin of replication and an erythromycin resistance cassette [59], to  
399 generate pDP299.

400 To generate the  $\Delta$ *lytD* in-frame marker-less deletion construct, the region upstream  
401 of *lytD* was PCR-amplified using the primer pair 1429/1430 and digested with Sall and  
402 EagI, and the region downstream of *lytD* was PCR-amplified using the primer pair  
403 1431/1432 and digested with EagI and BamHI. The two fragments were then  
404 simultaneously ligated into the Sall and BamHI sites of pMiniMAD to generate pDP300.

405 Deletion plasmids were introduced into strain DK1042 (Table S2) via single cross-  
406 over integration by transformation at the restrictive temperature for plasmid replication  
407 (37 °C) using MLS resistance as a selection. To evict the plasmid, the strain was incubated  
408 in 3 mL LB broth at a permissive temperature for plasmid replication (22 °C) for 14 h, and  
409 serially diluted and plated on LB agar at 37 °C. Individual colonies were patched on LB

410 plates and LB plates containing MLS to identify MLS-sensitive colonies that had evicted the  
411 plasmid. Chromosomal DNA from colonies that had evicted the plasmid was purified and  
412 screened by PCR using primers 1427/1426 or 1430/1431 to determine isolates that had  
413 retained the  $\Delta$ *lytC* or  $\Delta$ *lytD* allele, respectively [59, 60].

414 In-frame deletions of MLS-knockout mutants were constructed as outlined  
415 previously [14]. Briefly, the strain of interest was transformed with pDR244 at 30 °C.  
416 Several transformants were struck onto LB at 42 °C. Resultant colonies were patched on  
417 MLS and spectinomycin plates to confirm that the plasmid and MLS cassette were lost.  
418 Colonies were screened for altered oxygen phenotype.

419

#### 420 **Growth and lysis assays**

421 Strains were struck out for single colonies on the evening prior to the experiment. Colonies  
422 were inoculated into fresh LB and grown aerobically at 37 °C, either in 5 mL LB on a roller  
423 drum or in 200  $\mu$ L in a Greiner 96-well plate. To deplete oxygen from cultures grown in test  
424 tubes, 200  $\mu$ L were aliquoted into a 96-well plate and the plate was sealed with optical film  
425 (Excel Scientific AeraSeal). To grow cultures in the plate reader, 200  $\mu$ L of stationary-phase  
426 inocula were aliquoted into each well of a 96-well plate, with the edge wells containing  
427 medium only. Optical film was used to cover the plates, and one hole per well was poked  
428 using a 20-gauge needle to allow for air exchange. 168 and 3610 cultures were then grown  
429 until the 3610 culture reached an  $OD_{600} \sim 1.0$ . To deplete the oxygen, the plate was taken  
430 out of the plate reader, the optical seal with holes was removed, and a new seal was placed  
431 onto the plate to fully cut off oxygen exchange. We grew and depleted cultures at 37 °C

432 using linear shaking (567 cpm, 3-mm magnitude) and read OD<sub>600</sub> every 7.5 min in a Biotek  
433 Epoch2 spectrophotometer.

434

#### 435 **Mariner transposon library construction**

436 The mariner transposon was used to create a library of insertion mutants. The parent  
437 strains (HA1235 and HA1414) were struck for single colonies onto MLS plates at 30 °C. One  
438 colony per library was grown in 3 mL LB+kanamycin at room temperature overnight.  
439 Transposon-insertion libraries were selected by plating 10-fold dilutions of the cultures on  
440 prewarmed LB+kanamycin plates and incubating overnight at 37 °C.

441

#### 442 **Screen to enhance for mutants that survive better without oxygen**

443 Each library (~5000-10,000 colonies per library) was inoculated into 5 mL LB and grown  
444 on a roller drum at 37 °C to an OD<sub>600</sub>~1.0. Libraries were then aliquoted into wells of a 96-  
445 well plate (200 µL per well) and plates were sealed to deplete oxygen. Oxygen was  
446 depleted at 37 °C for 2-8 days for 168 libraries or at 30 °C for 4-8 days for 3610 libraries. At  
447 various time points following the start of oxygen depletion, one well of the library was  
448 harvested and struck out for single colonies. One or two colonies per well were tested for  
449 either enhanced lysis upon oxygen depletion (3610 background) or enhanced colony-  
450 forming ability (168 background). Any mutants found to have these phenotypes were back-  
451 crossed into the parent using SPP1 phage transduction to ensure the transposon mutation  
452 was the causative agent. To map the mutation, genomic DNA was prepped from each  
453 mutant. Inverse PCR was carried out using Phusion polymerase with the primers IPCR1

454 and IPCR2. The PCR products were gel-purified and sequenced using the IPCR2 primer. The  
455 sequences were mapped onto the *B. subtilis* genome using BLASTN.

456

### 457 **Oxygen nanoprobe measurements**

458 Relative oxygen levels were measured using the oxygen-sensitive nanoprobe  
459 (BF<sub>2</sub>nbm(I)PLA) that emits an oxygen-dependent phosphorescence reading and an oxygen-  
460 independent fluorescence reading, which together can be used to calculate the relative  
461 oxygen level of the medium [61, 62]. Briefly, the nanoprobe was added at 5% (10  $\mu$ L into  
462 190  $\mu$ L) to the inoculum before growth of the cultures. In addition to OD<sub>600</sub> readings,  
463 fluorescence readings (ex/em: 414/450 nm) and phosphorescence readings (ex/em:  
464 415/560 nm, with a 2-ms delay between excitation and emission) were taken using a  
465 Biotek Synergy H1 spectrophotometer. Readings were taken every 7.5 min, with incubation  
466 at 37 °C and linear shaking (567 cpm, 3-mm magnitude of shaking).

467

### 468 **PI staining and phase microscopy**

469 Five hundred nanoliters of cultures were spotted onto LB pads made with 1.5% agar and  
470 10  $\mu$ M PI. Once dry, a coverslip was added and cells were imaged on a Nikon Ti-E inverted  
471 microscope using a 100X objective (NA: 1.4). Phase and fluorescence (mCherry filter,  
472 ex/em: 570/645 nm) images were acquired. Images were processed identically in Adobe  
473 Photoshop and merged using FIJI.

474

### 475 **Time-lapse microscopy of oxygen-depleted cultures**

476 The bottom of a rectangular Singer PlusPlate culture plate was used to make a large pad  
477 [63], in which 35 mL of LB+1.5% agar was pipetted onto the plate ~1 h before imaging so  
478 that the agar could solidify completely. Once solid (after ~5-10 min), a second Singer  
479 PlusPlate was placed on top of the agar pad to prevent contamination and drying. One  
480 microliter of cultures was spotted in the center of the pad and allowed to dry. A large 113  
481 by 77 mm custom-made no. 1.5 glass coverslip (Nexterion) was applied [63]. Imaging was  
482 carried out in a heated environmental chamber with a water bubbler and several  
483 reservoirs of water to humidify the chamber. Phase images were acquired on a Nikon Ti-E  
484 inverted microscope every 5 min using a 40X air objective (NA: 0.95) with 1.5X  
485 magnification. Images were compiled into movies and analyzed using Matlab or FIJI. All  
486 rod-shaped cells were identified in the first frame and defined as able to grow if they at  
487 least doubled in mass and divided without lysis during the experiment.

488

#### 489 **Fluorescent D-amino acid staining**

490 HADA [64] was added to cultures at a final concentration of 500  $\mu$ M during the last mass  
491 doubling of growth. To reduce background staining, cultures were diluted 1:10 in MSgg  
492 solution (5 mM potassium phosphate buffer + 0.05 M MOPS at pH 7) and then spotted onto  
493 a pad of that solution made with 1.5% agar. Cells were imaged using a Nikon Ti-E inverted  
494 microscope with a 100X oil objective (NA: 1.4). Phase and fluorescence (DAPI filter, ex/em:  
495 375/460 nm, exposure time 2 s) images were acquired. Phase and fluorescence images  
496 were adjusted identically in Adobe Photoshop and merged in FIJI.

497

#### 498 **Plating efficiency**



499 Cultures were harvested and diluted 10-fold into LB. One hundred microliters of the  
500 dilutions were plated onto an LB plate. These plates were incubated overnight at 37 °C in a  
501 single layer (not stacked). CFU/mL values of the original culture were calculated from the  
502 colony counts of the dilutions that had distinct colonies.

503

#### 504 **Lysis assay starting at different optical densities**

505 Three colonies were inoculated into a single 10 mL LB culture and mixed well. Six two-fold  
506 serial dilutions of the culture were carried out and 5 mL of each dilution were transferred  
507 to a test tube and incubated at 37 °C on a roller drum until the undiluted culture reached an  
508  $OD_{600} \sim 0.8$ . Two hundred microliters of each culture were then aliquoted into a 96-well  
509 plate, the plate was sealed with optical film, and  $OD_{600}$  was monitored in a Biotek Epoch2  
510 spectrophotometer.

511

#### 512 **Oxygen depletion in an anaerobic chamber**

513 Cultures were grown in aerobic conditions (96-well plate sealed with optical film, with  
514 holes poked through the film for each well). Cultures were then transferred into a Coy  
515 anaerobic chamber and  $OD_{600}$  was monitored using a Biotek Epoch2 spectrophotometer as  
516 above.

517

#### 518 **Biophysical model linking oxygen diffusivity and concentration in a growing culture**

519 Since the addition of surfactin increased oxygen levels in late-exponential phase of a  
520 growing culture (Fig. 3D), we sought to understand whether oxygen diffusivity could  
521 explain the increase. In a small region of extent  $\Delta l$  at a depth  $l$  below the air-liquid interface

522 of the culture, oxygen is depleted at a rate  $\gamma \times \rho(l) \times c(l)\Delta l$ , where  $\gamma$  is the absorption rate  
523 per unit oxygen in close proximity to a cell,  $\rho(l)$  is the cell density at depth  $l$ , and  $c(l)$  is the  
524 oxygen concentration at depth  $l$ . At steady state, the rate of oxygen uptake in the region of  
525 extent  $\Delta l$  must be balanced by the rate of supply via diffusion, that is

526 
$$D \frac{\partial^2 c}{\partial l^2} \Delta l = \gamma \rho c \Delta l, \quad (1)$$

527 where  $D$  is the diffusivity of oxygen. The solution to Eq. 1 is  $c(l) = c_0 e^{-l\sqrt{\gamma\rho/D}}$ , assuming  
528 that  $c_0$  is the oxygen concentration at the surface,  $c \rightarrow 0$  as  $l \rightarrow \infty$ , and  $\gamma\rho/D$  is independent  
529 of  $l$ . Hence, as  $D$  increases, oxygen reaches increased depths as  $\sim \sqrt{D/\gamma\rho}$ , and the total  
530 amount of oxygen in the culture increases as  $\int c(l)dl = c_0\sqrt{D/\gamma\rho}$ . Thus, a 1.2-fold increase  
531 in the total amount of oxygen corresponds to a 1.4-fold increase in  $D$  of  $\sim 1.4$ -fold,  
532 assuming that  $c_0$  is linked to solubility and  $\gamma$  and  $\rho$  remain approximately constant.

533

### 534 **Membrane potential measurements**

535 Membrane potential was measured using a protocol modified from [42]. Cells were grown  
536 in 5 mL LB in a roller drum to  $OD_{600} \sim 1$ . Cells were washed in a buffer containing 10 mM  
537 potassium phosphate, 5 mM  $MgSO_4$ , and 250 mM sucrose (pH 7.0) and then resuspended  
538 to a calculated  $OD_{600}$  of 0.085 in that same buffer (pelleting steps were at 5100 rcf for 3  
539 min). Two hundred microliters of this mixture were added to wells in a 96-well plate. 1  $\mu M$   
540 DiSC3(5) or 10  $\mu M$  Thioflavin T (ThT) were added to the wells. Fluorescence readings  
541 (em/ex: 620/685 for DISC and 450/482 for ThT) were taken every 12 s with 5 s of linear  
542 shaking (567 cpm, 3-mm magnitude) on a Biotek Synergy H1 spectrophotometer. Readings

543 were collected for ~3 min before the drug was added and then readings were collected for

544 another 10 min.

545

546 **Acknowledgements**

547 The authors thank Alfred Spormann, Kyler Lugo, and the Huang lab for helpful discussions,  
548 Chao Jiang for help with strain construction, and Maya Farha and Eric Brown for help with  
549 membrane potential measurements. The authors acknowledge support from the Allen  
550 Discovery Center at Stanford on Systems Modeling of Infection (to H.A.A. and K.C.H.),  
551 National Institutes of Health (NIH) grants R35 GM131783 (to C.M.D. and D.B.K.) and R01  
552 CA167250 (to C.A.D. and C.L.F.), and the Stanford Summer Research Amgen Scholars  
553 Program (to L.V.). K.C.H. is a Chan Zuckerberg Biohub Investigator.

554 **Figure Legends**

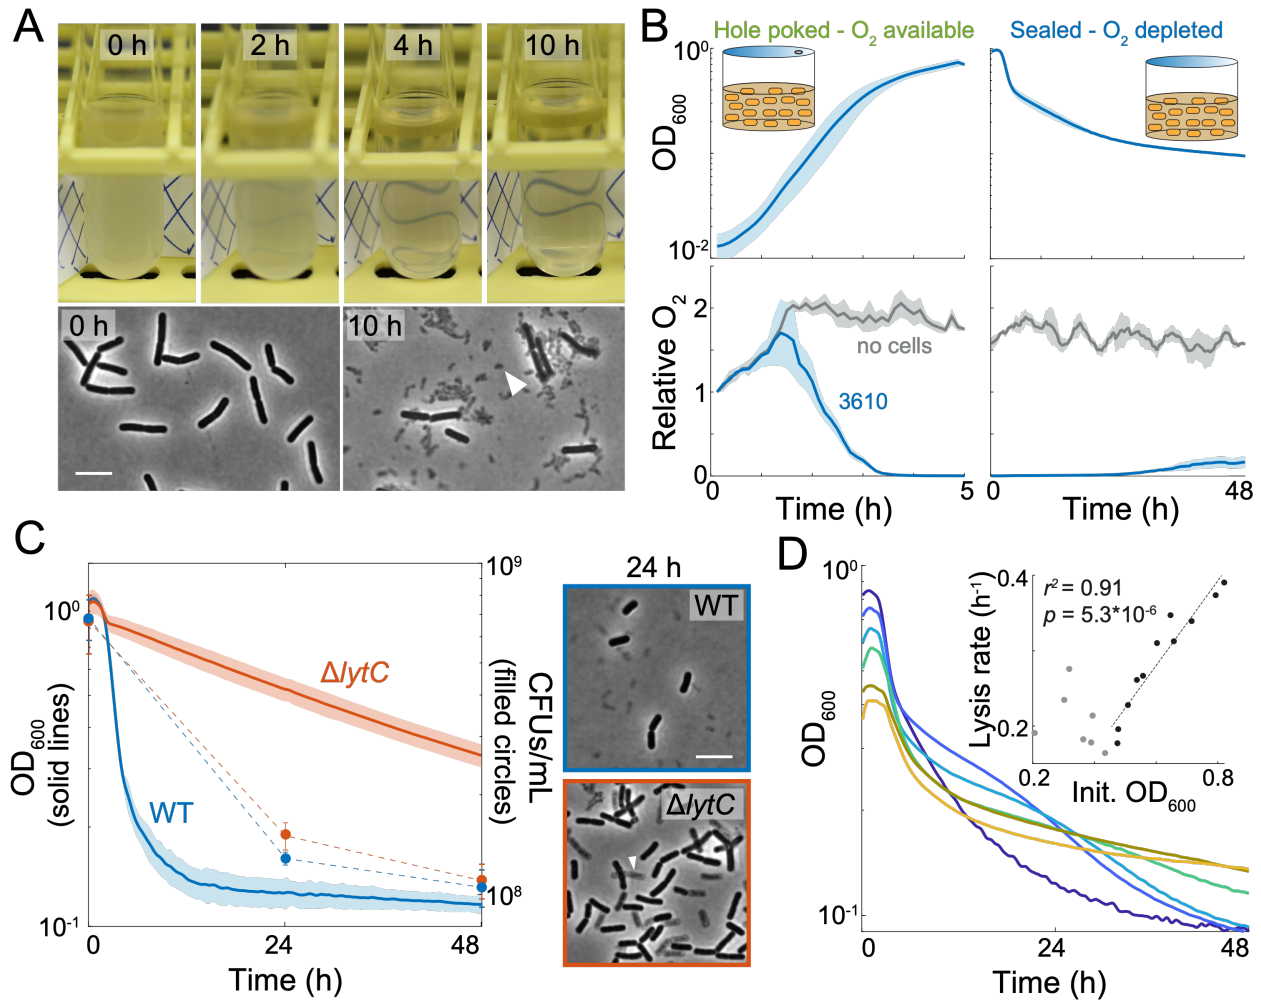

555

556 **Figure 1: *B. subtilis* 3610 lyses due to oxygen depletion.**

557 (A) *B. subtilis* cultures lyse when not shaking. Wild-type strain 3610 (WT) was grown in

558 a test tube and then incubated at room temperature without shaking for 10 h.

559 Phase-contrast images were acquired at 0 and 10 h. Scale bar: 5 μm; arrowhead

560 points to cell debris.

561 (B) Oxygen is depleted during exponential growth and remains low throughout

562 subsequent oxygen depletion while cultures are sealed. Cells were cultured with

563 oxygen-sensitive nanoparticles (Methods). OD<sub>600</sub> (top) and the relative oxygen

564 levels (bottom, oxygen level at first timepoint normalized to 1) of the cultures were  
565 measured. Lines represent the average and shading represents one standard  
566 deviation (SD),  $n=3$ .

567 (C) *LytC* is necessary for lysis. Left: cultures were grown to an  $OD_{600} \sim 1$  and then oxygen  
568 was depleted at  $t=0$  h and  $OD_{600}$  was monitored. Shading represents 1 SD,  $n=3$ .  
569 Despite the differences in OD, the  $\Delta$ *lytC* 3610 mutant has similar viability to wild  
570 type ( $p=0.07$  at 24 h and 0.67 at 48 h, Student's t-test). Right: phase-contrast images  
571 of wild-type and  $\Delta$ *lytC* cells at 24 h post-oxygen depletion. Scale bar: 5  $\mu$ m;  
572 arrowhead points to phase-gray, lysed cell.

573 (D) Culture lysis is strongly correlated with initial cell density when the initial  
574  $OD_{600} > 0.45$ . Representative lysis curves of 6 cultures that vary in initial  $OD_{600}$  (see  
575 Fig. S1 for other independent replicates). Inset: the maximum lysis rate vs. initial  
576  $OD_{600}$ . A linear regression analysis was performed on all data with initial  
577  $OD_{600} > 0.45$ .

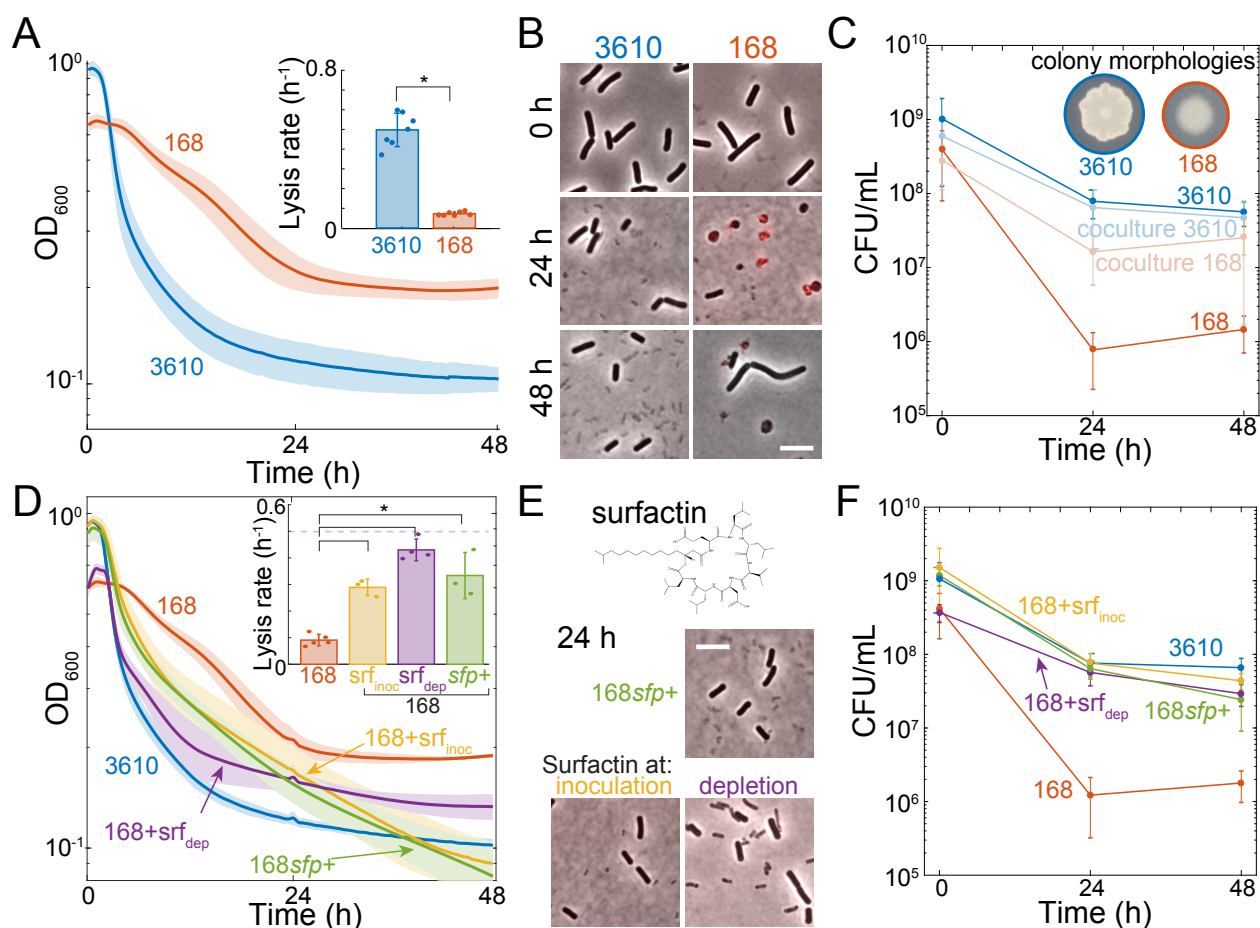

578

579 **Figure 2: Surfactin production is necessary to maintain viability.**

580 (A) *B. subtilis* strain 168 lyses less upon oxygen depletion than 3610. *B. subtilis* 3610  
 581 and 168 strains were grown aerobically and then depleted for oxygen at 0 h. Lines  
 582 represent the average and shading represents 1 SD,  $n=7$ . Inset: maximum lysis rate  
 583 of 3610 culture is significantly higher than that of 168 (\*:  $p=1.7 \times 10^{-8}$ , Student's t-  
 584 test; Methods). Circles show individual experiment values, and error bars represent  
 585 1 SD.

586 (B) Many 168 cells form cell-wall-less protoplasts upon oxygen depletion. Merge of  
 587 phase-contrast and fluorescence images of propidium iodide (PI)-stained cells at 0,  
 588 24, and 48 h post oxygen depletion. Red indicates membrane-compromised cells.

589 (C) Co-culturing 168 with 3610 rescues its viability upon oxygen depletion. 168  
590 viability in monoculture is significantly different than 3610 (\*:  $p < 0.005$ ; student's t-  
591 test). Inset: 3610 and 168 have distinct colony morphologies when plated on LB.  
592 Error bars represent 1 SD,  $n = 3-5$ .

593 (D) Culturing with exogenous surfactin increases lysis of 168 cultures upon oxygen  
594 depletion. OD curves during oxygen depletion of 3610, 168, and 168 genetically  
595 rescued for surfactin production (168*sfp+*) or with 48  $\mu\text{M}$  exogenous surfactin  
596 added before growth (*srf<sub>inoc</sub>*) or at depletion (*srf<sub>dep</sub>*). Lines represent the average  
597 and shading represents 1 SD,  $n = 3-5$ . Inset: maximum lysis rates (\*:  $p < 0.001$ ;  
598 Student's t-test).

599 (E) Culturing with exogenous surfactin eliminates protoplasts from 168. Top: surfactin  
600 molecular structure. Bottom: phase-contrast and PI fluorescence imaging at 24 h  
601 post-oxygen depletion of 168*sfp+* cells or with exogenous surfactin.

602 (F) Surfactin restores the viability of 168 cultures to near 3610 levels upon oxygen  
603 depletion. Error bars represent 1 SD,  $n = 3-5$ . Surfactin-treated 168 (*srf<sub>inoc</sub>*, *srf<sub>dep</sub>*,  
604 and 168*sfp+*) cultures are each significantly different than 168 ( $p < 0.001$  at 24 h,  
605  $p < 0.01$  at 48 h, Student's t-test). By contrast, the viability of surfactin-treated 168  
606 cultures are not significantly different than that of 3610 at 24 h ( $p > 0.2$ , Student's t-  
607 test).



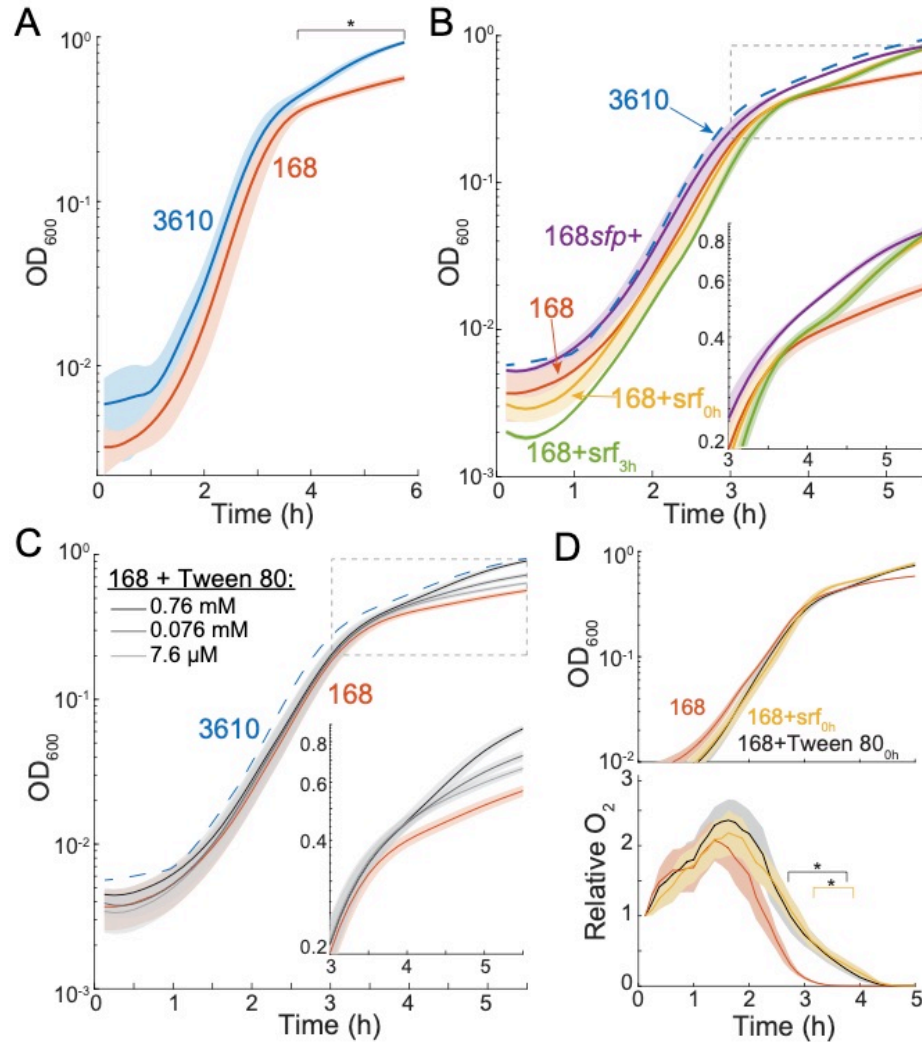

608

609 **Figure 3: Surfactin restores the growth yield of 168 due to its detergent properties.**

610 (A) 3610 aerobic cultures achieve a higher growth yield than 168. Lines represent the  
611 average and shading represents 1 SD,  $n=3$ . \*: time period over which 168 growth  
612 differed significantly from that of 3610 ( $p<0.05$ , Student's t-test).

613 (B) Surfactin addition rescues growth yield. Growth curves of 168 with surfactin  
614 restored genetically (168sfp+) or 48 μM added exogenously at inoculation  
615 (168+srf<sub>0h</sub>) or at  $t = 3$  h (168+srf<sub>3h</sub>). Lines represent the average and shading  
616 represents 1 SD,  $n=3$ . The mean 3610 growth curve from (A) is shown as dotted  
617 blue line. Inset: zoom-in to the period of growth divergence.

618 (C) Tween 80 addition rescues growth yield in a concentration-dependent manner.

619 Lines represent the average and shading represents 1 SD,  $n=3$ . The mean 3610  
620 growth curve from (A) is shown as dotted blue line. Inset: zoom-in to the period of  
621 growth divergence.

622 (D) Surfactin addition increases oxygen levels during late exponential phase. Relative  
623 oxygen levels (bottom) during growth (top) of 168 with surfactin (48  $\mu\text{M}$ ) or Tween  
624 80 (0.76 mM) added. \*: time period over which oxygen levels of 168+surfactin  
625 (yellow) or 168+Tween 80 (black) were significantly different from 168 cultures  
626 ( $p<0.05$ , Student's t-test).

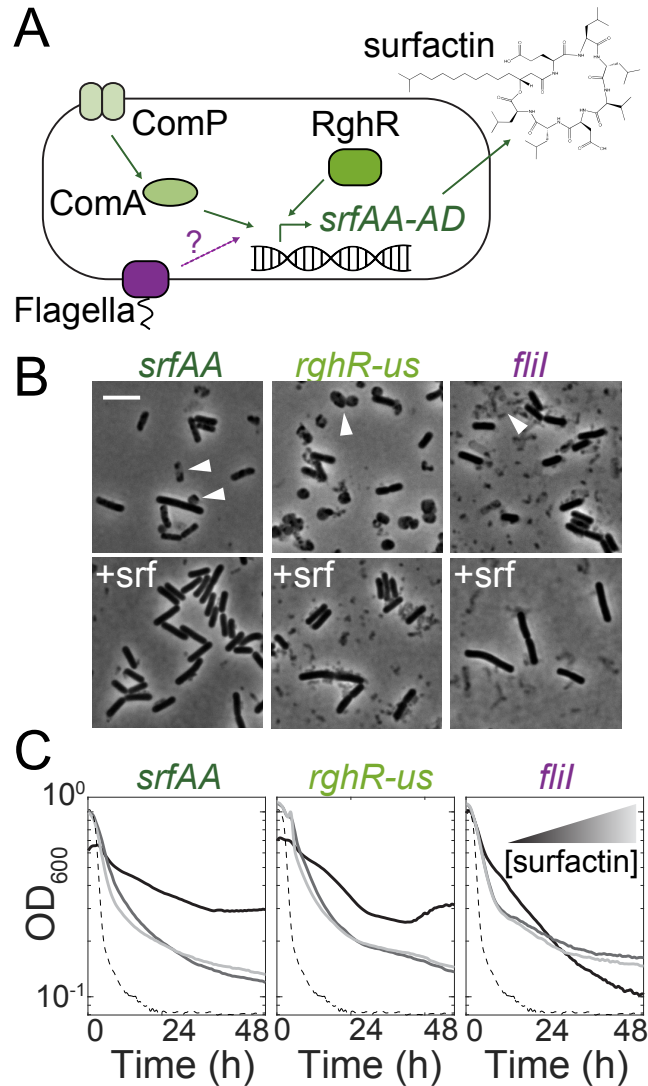

627

628 **Figure 4: Transposon mutagenesis identifies genes that impact lysis during oxygen**  
629 **depletion.**

630 (A) Schematic of regulation of the surfactin synthetase gene operon (*srfAA-AD*). Known  
631 regulators of SrfAA are shown in green. Our data suggests flagellar proteins (purple)  
632 may also regulate surfactin.

633 (B) Surfactin-treated cultures of the transposon-disrupted mutants have fewer  
634 protoplasts and cell debris. Phase-contrast images of mutants depleted of oxygen  
635 for 24 h with and without 48  $\mu$ M exogenous surfactin. Top: arrowheads show

636 protoplasts, phase-gray dead cells, and cell debris, all of which were not observed in  
637 the surfactin-treated cultures.

638 (C) Transposon hits exhibit faster lysis when treated with exogenous surfactin. Black  
639 curves are without surfactin, medium and light gray curves are with 24  $\mu\text{M}$  and 48  
640  $\mu\text{M}$  surfactin, respectively. The dashed line is the parent (3610).

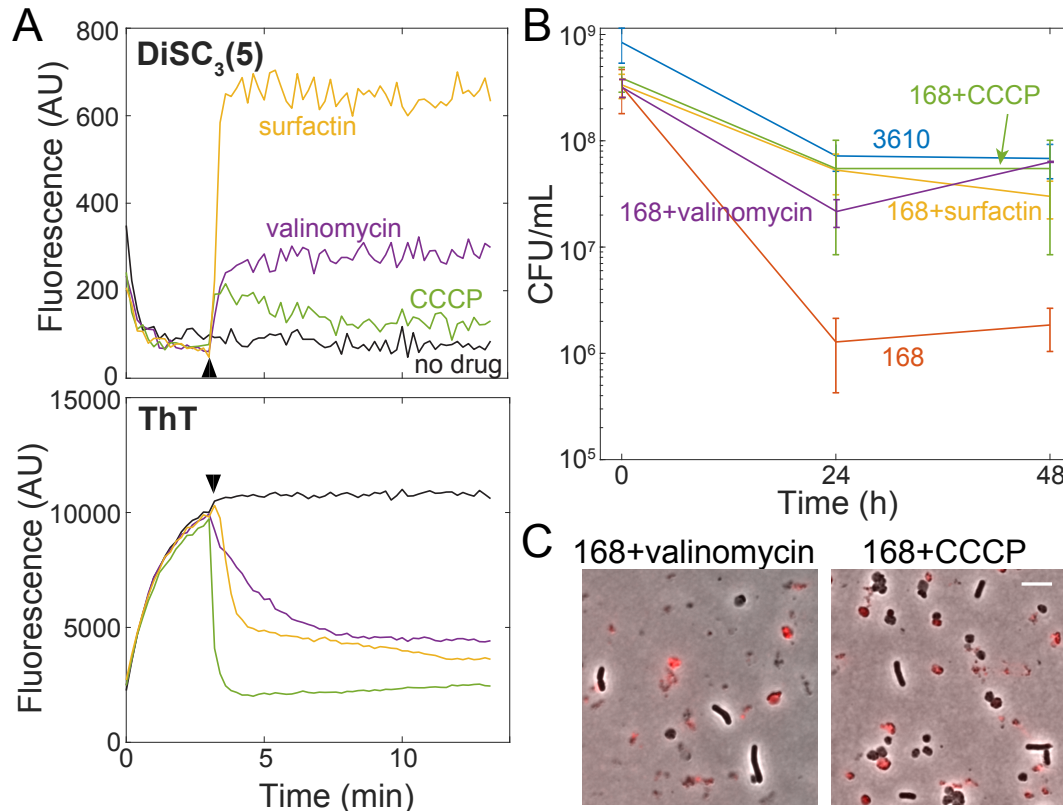

641

642 **Figure 5: Surfactin maintains viability upon oxygen depletion by depolarizing the**  
643 **membrane.**

644 (A) Surfactin depolarizes the membrane in *B. subtilis*. Membrane potential assays of 168  
645 cells using the dyes DiSC<sub>3</sub>(5) (top) and ThT (bottom). The time of addition of  
646 surfactin (48  $\mu$ M), valinomycin (50  $\mu$ M) and CCCP (5  $\mu$ M) is marked by the black  
647 arrowhead. One representative experimental replicate is shown (other replicates  
648 are in Fig. S4).

649 (B) Treatment with the membrane depolarizing agents valinomycin (5  $\mu$ M) and CCCP (5  
650  $\mu$ M) restore plating efficiency of *B. subtilis* 168 after oxygen depletion, similar to  
651 surfactin (48  $\mu$ M). Error bars represent 1 SD,  $n=3-5$ . 168 plating efficiency data are  
652 significantly different than those of 168+surfactin, 168+valinomycin, 168+CCCP,  
653 and 3610 ( $p<0.005$ , Student's t-test).

654 (C) Valinomycin and CCCP-treated 168 cultures exhibit protoplasts, demonstrating that  
655 protoplast removal is not necessary for viability enhancement. Overlays of phase-  
656 contrast and PI fluorescence (red) images at 24 h post-oxygen depletion. Scale bar:  
657 5  $\mu\text{m}$ .  
658

659 **Supplemental Figures**

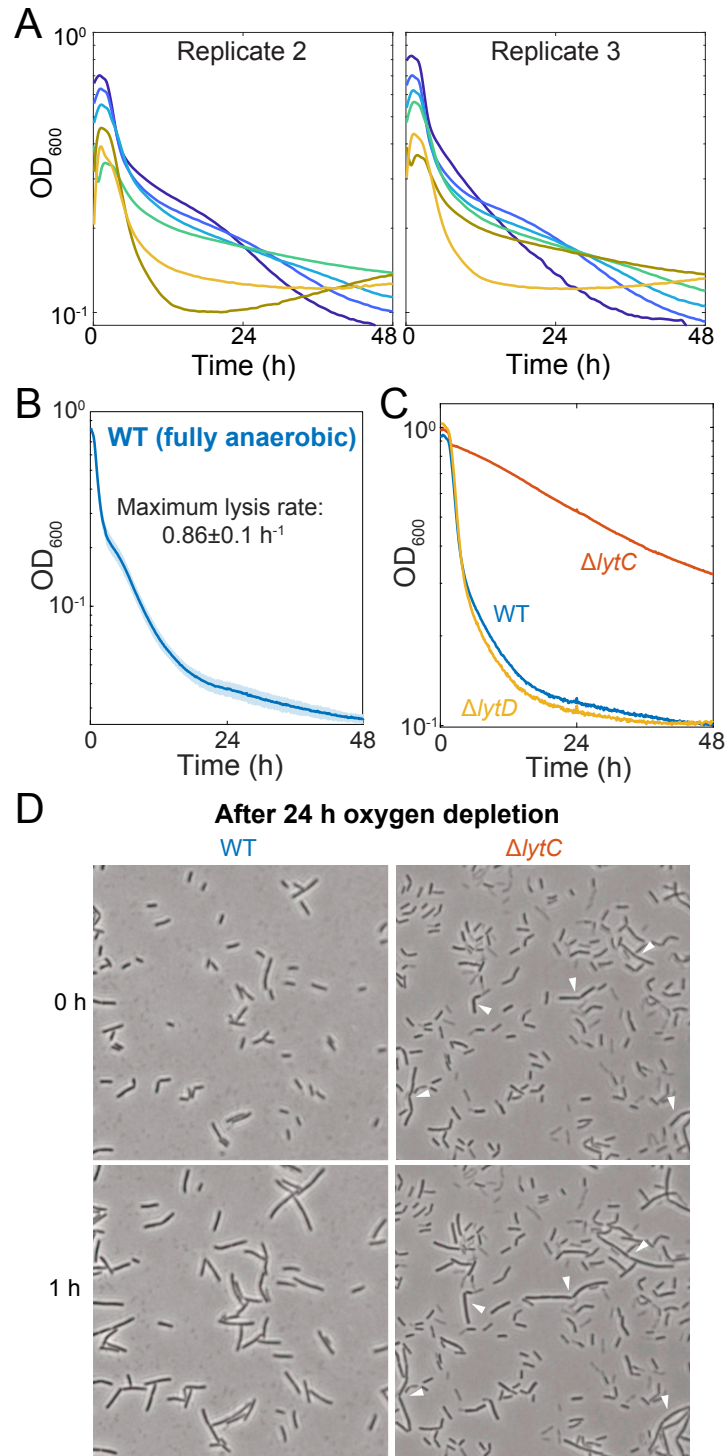

660

661 **Figure S1: Characterization of depletion in an anaerobic chamber and of  $\Delta lytC$  and**

662  **$\Delta lytD$  mutants. (Related to Figure 1)**

663 (A) Culture lysis depends on cell density at the time of oxygen depletion. Two sets of  
664 independent lysis curves that vary in initial OD<sub>600</sub> are shown; see Fig. 1D for the  
665 other independent experiments.

666 (B) Cell lysis is more rapid under anaerobic conditions. Cultures were grown in 96-well  
667 plates to an OD<sub>600</sub>~1 and then transferred to an anaerobic chamber to rapidly  
668 remove oxygen from the culture. Line represents the average and shading  
669 represents 1 SD,  $n=3$ .

670 (C)  $\Delta$ *lytD* cells show similar rates of lysis to wild-type (WT) 3610 cells upon oxygen  
671 depletion, unlike  $\Delta$ *lytC* cells that exhibit slower lysis. Strains were grown to an  
672 OD<sub>600</sub> ~1 and then oxygen was depleted at  $t = 0$ .

673 (D) After oxygen-depletion, the majority of WT cells but only a small subset of  $\Delta$ *lytC*  
674 cells resume growth. After 24 h of oxygen depletion, WT and  $\Delta$ *lytC* cultures were  
675 spotted onto an LB pad with oxygen and cell growth was monitored. Nearly all WT  
676 cells grew but only a few  $\Delta$ *lytC* cells grew (arrowheads). Images shown are frames  
677 from Supplemental movies 1 and 2.



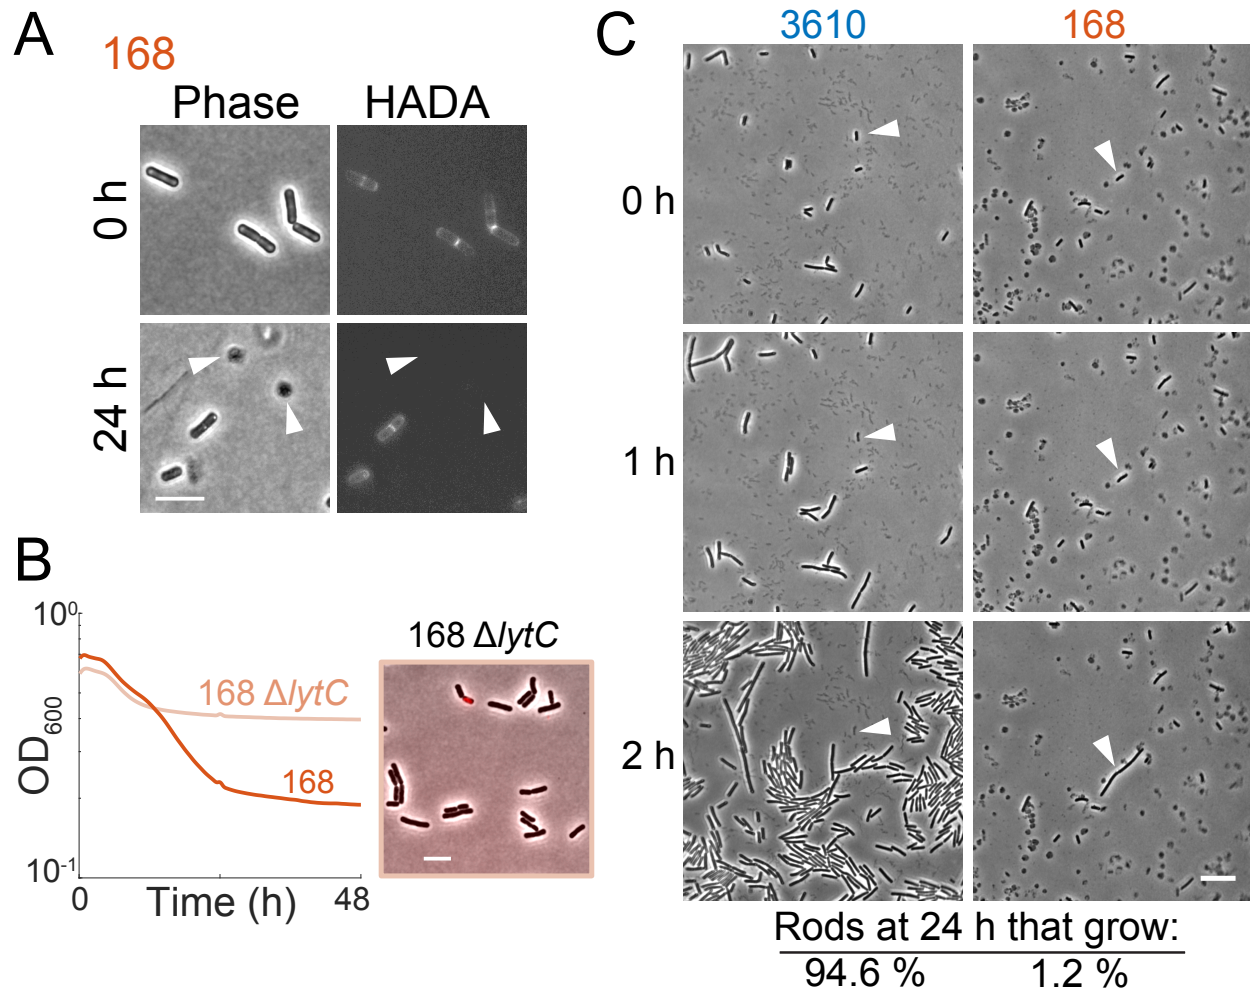

678

679 **Figure S2: Oxygen depletion causes production of wall-less protoplasts in 168 and a**  
680 **low percentage of cells that are able to resume growth. (Related to Figure 2)**

681 (A) Cell-wall staining reveals that protoplasts have lost their cell wall. Phase-contrast  
682 and HADA (cell wall) staining of 168 cultures at 24 h post-oxygen depletion. Cells  
683 were stained with HADA for the last doubling before oxygen was depleted and the  
684 dye was present during the duration of depletion. Orange arrowheads: phase-dark  
685 spherical cells that lack cell wall staining. Scale bar: 5  $\mu$ m.

686 (B) 168  $\Delta$ *lytC* mutants remain rod-shaped following oxygen depletion. Left: OD<sub>600</sub> of  
687 168  $\Delta$ *lytC* exhibited somewhat slower lysis than the parent. Right: overlay of phase-  
688 contrast and propidium iodide staining of 168  $\Delta$ *lytC* cells.

689 (C) Almost all 3610 cells grow once oxygen is restored following 24 h of oxygen  
690 depletion, but only ~1% of 168 cells grow in similar circumstance. Cells from 3610  
691 and 168 cultures after 24 h of oxygen depletion were spotted onto an LB pad and  
692 imaged in time-lapse to determine which cells were capable of growing and  
693 dividing. For 3610, the arrowhead points to a rare rod-shaped cell that did not  
694 grow. For 168, the arrowhead points to a rare rod-shaped cell that grew. Scale bar:  
695 10  $\mu$ m.  $n = 536$  and  $604$  rod-shaped cells for 3610 and 168, respectively. Images  
696 shown are frames from Movies S3 and S4.

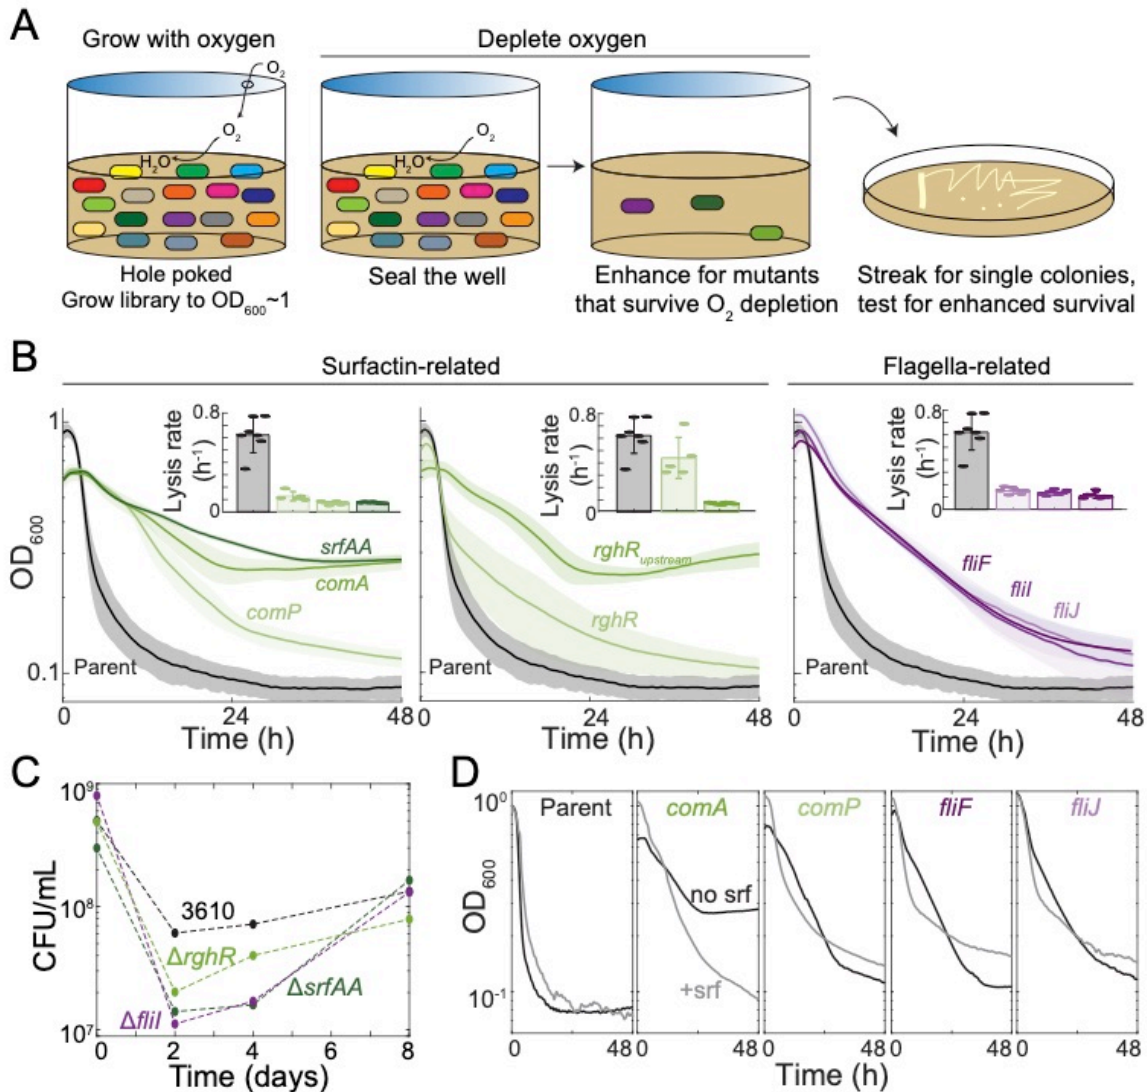

697

698 **Figure S3: Characterization of hits from transposon screen. (Related to Figure 4)**

699 (A) Schematic of transposon screen design. A transposon mutant library was grown to

700 an  $OD_{600} \sim 1$ , and then oxygen was depleted. We screened cells that were able to

701 recover after oxygen depletion for oxygen depletion phenotypes.

702 (B) Transposon mutants have a reduced lysis rate.  $OD_{600}$  curves during oxygen

703 depletion of cultures related to surfactin regulation (green) or flagella (purple).

704 Lines represent the average and shading represents 1 SD,  $n=5$ . Inset: maximum lysis

705 rates. Error bars represent 1 SD,  $n=5$ .

706 (C) Plating efficiency of clean deletions of *srfAA*, *fliI*, and *rghR* are lower than that of  
707 3610 2 and 4 days following oxygen depletion.

708 (D) Addition of 48  $\mu$ M surfactin increases the lysis rate of hits from transposon mutant  
709 screen.

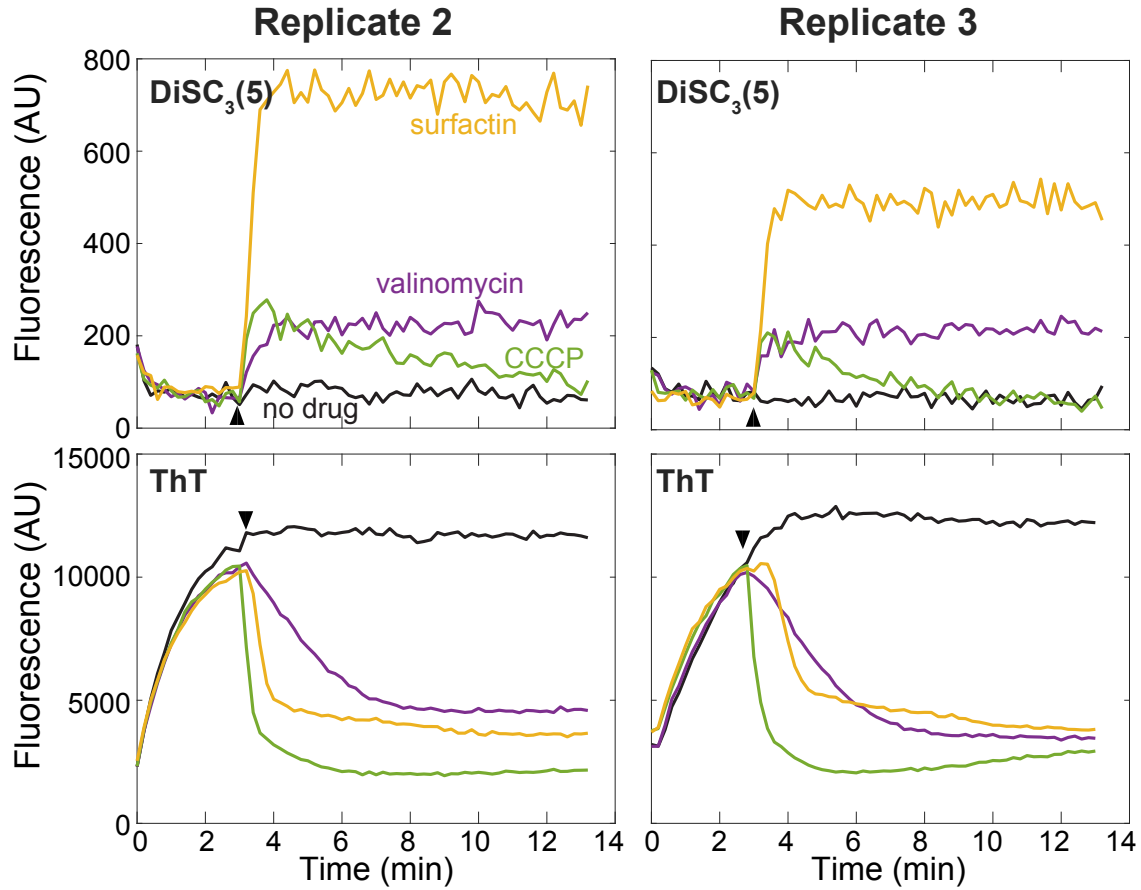

716 **Supplemental Movie Legends**

717

718 **Supplemental Movie 1:** The majority of oxygen-depleted cells from strain 3610 grow once  
719 oxygen is restored. Cells from a 24 h oxygen-depleted wild-type 3610 culture were spotted  
720 onto an LB pad and imaged every 5 min at 37 °C. This experiment was done in tandem with  
721 the 3610  $\Delta$ *lytC* cultures in Movie S2.

722

723 **Supplemental Movie 2:** A small subset of oxygen-depleted cells in the 3610  $\Delta$ *lytC* cultures  
724 grow once oxygen is restored. Cells from a 24 h oxygen-depleted  $\Delta$ *lytC* culture were spotted  
725 on an LB pad and imaged every 5 min at 37 °C. This experiment was done in tandem with  
726 the 3610 cultures in Movie S1.

727

728 **Supplemental Movie 3:** The majority of oxygen-depleted cells from strain 3610 grow once  
729 oxygen is restored. This experiment was carried out as in Movie S1, and was done in  
730 tandem with the 168 cultures in Movie S4.

731

732 **Supplemental Movie 4:** A very small subset of oxygen-depleted, rod-shaped cells from  
733 strain 168 grow once oxygen is restored. Cells from a 24 h oxygen-depleted culture were  
734 spotted on an LB pad and imaged every 5 min at 37 °C. This experiment was done in  
735 tandem with the 3610 cultures in Movie S3.

736

737 **Supplemental Tables**

738 **Table S1: Information about hits from transposon screen.**

| <b>Gene hit</b>            | <b># independent hits</b> | <b>Gene function</b>                                    |
|----------------------------|---------------------------|---------------------------------------------------------|
| <i>srfAA</i>               | 1                         | surfactin synthetase                                    |
| <i>comA</i>                | 3                         | <i>comP/comA</i> quorum sensing response regulator      |
| <i>comP</i>                | 4                         | <i>comP/comA</i> quorum sensing sensor histidine kinase |
| <i>rghRA</i>               | 1                         | transcriptional repressor                               |
| <i>rghRA</i> -<br>upstream | 1                         | transcriptional repressor                               |
| <i>fliI</i>                | 1                         | flagella chaperone                                      |
| <i>fliF</i>                | 1                         | flagella chaperone                                      |
| <i>fliJ</i>                | 1                         | flagella basal ring                                     |

739

740 **Table S2: List of strains used in this study.**

| Strain name                                              | Nickname                  | Genotype                                                                                                              | Reference or source |
|----------------------------------------------------------|---------------------------|-----------------------------------------------------------------------------------------------------------------------|---------------------|
| HA10                                                     | 3610                      | <i>trpC+</i> , <i>rapP+</i> , <i>sfp+</i> , <i>epsC+</i> , <i>swrA+</i> , <i>degQ+</i> , <i>pBS32</i>                 | Kearns lab          |
| DK5073                                                   | 3610 $\Delta$ <i>lytC</i> | 3610, $\Delta$ <i>lytC</i>                                                                                            | This work           |
| DK5075                                                   | 3610 $\Delta$ <i>lytD</i> | 3610, $\Delta$ <i>lytD</i>                                                                                            | This work           |
| HA1                                                      | 168                       | <i>trpC2</i>                                                                                                          | Carol Gross lab     |
| BKE35620                                                 | 168 $\Delta$ <i>lytC</i>  | 168, $\Delta$ <i>lytC::MLS</i>                                                                                        | [14]                |
| HA1417                                                   | 168 <i>sfp+</i>           | 168, <i>swrAfs</i> , <i>sfp<sup>0</sup></i> , <i>amyE::P<sub>sfp</sub>-sfp cmR</i>                                    | This work           |
| HA1161                                                   | parent                    | 3610, $\Delta$ <i>SPB</i> , $\Delta$ <i>PBSX</i> , $\Delta$ <i>pBS32</i>                                              | Kearns lab          |
| HA1235                                                   | N/A                       | 3610, $\Delta$ <i>SPB</i> , $\Delta$ <i>PBSX</i> , $\Delta$ <i>pBS32</i> , <i>pMarA-kan</i>                           | This work           |
| HA1414                                                   | N/A                       | 168, <i>pMarA-kan</i>                                                                                                 | This work           |
| <b>Back-crossed transposon mutagenesis strains</b>       |                           |                                                                                                                       |                     |
| HA1225                                                   | <i>comA</i>               | 3610, $\Delta$ <i>SPB</i> , $\Delta$ <i>PBSX</i> , $\Delta$ <i>pBS32</i> , <i>comA::pMarA-kan</i>                     | This work           |
| HA1227                                                   | <i>comP</i>               | 3610, $\Delta$ <i>SPB</i> , $\Delta$ <i>PBSX</i> , $\Delta$ <i>pBS32</i> , <i>comP::pMarA-kan</i>                     | This work           |
| HA1228                                                   | <i>fliJ</i>               | 3610, $\Delta$ <i>SPB</i> , $\Delta$ <i>PBSX</i> , $\Delta$ <i>pBS32</i> , <i>fliJ::pMarA-kan</i>                     | This work           |
| HA1229                                                   | <i>fliI</i>               | 3610, $\Delta$ <i>SPB</i> , $\Delta$ <i>PBSX</i> , $\Delta$ <i>pBS32</i> , <i>fliI::pMarA-kan</i>                     | This work           |
| HA1233                                                   | <i>fliF</i>               | 3610, $\Delta$ <i>SPB</i> , $\Delta$ <i>PBSX</i> , $\Delta$ <i>pBS32</i> , <i>fliF::pMarA-kan</i>                     | This work           |
| HA1234                                                   | <i>srfAA</i>              | 3610, $\Delta$ <i>SPB</i> , $\Delta$ <i>PBSX</i> , $\Delta$ <i>pBS32</i> , <i>srfAA::pMarA-kan</i>                    | This work           |
| HA1281                                                   | <i>yvaN</i>               | 3610, $\Delta$ <i>SPB</i> , $\Delta$ <i>PBSX</i> , $\Delta$ <i>pBS32</i> , <i>yvaN::pMarA-kan</i>                     | This work           |
| HA1282                                                   | <i>yvaN-us (upstream)</i> | 3610, $\Delta$ <i>SPB</i> , $\Delta$ <i>PBSX</i> , $\Delta$ <i>pBS32</i> , <i>yvaN-</i><br><i>upstream::pMarA-kan</i> | This work           |
| <b>Clean deletions of transposon mutagenesis strains</b> |                           |                                                                                                                       |                     |
| HA1369                                                   | $\Delta$ <i>srfAA</i>     | 3610, <i>srfAA</i>                                                                                                    | This work           |
| HA1374                                                   | $\Delta$ <i>fliI</i>      | 3610, <i>fliI</i>                                                                                                     | This work           |
| HA1377                                                   | $\Delta$ <i>rghRA</i>     | 3610, <i>rghRA</i>                                                                                                    | This work           |



| <b>BKECG 168 strains used to create clean deletions in 3610</b> |     |                        |      |
|-----------------------------------------------------------------|-----|------------------------|------|
| BKE03480                                                        | N/A | 168, <i>srfAA::MLS</i> | [14] |
| BKE16240                                                        | N/A | 168, <i>flil::MLS</i>  | [14] |
| BKE33660                                                        | N/A | 168, <i>rghRA::MLS</i> | [14] |

741

742 **Table S3: Primers and plasmids used in this study.**

| Primer number | Construct name | Sequence                                                       | Reference |
|---------------|----------------|----------------------------------------------------------------|-----------|
| 1427          | lytCUF Sall    | AGGAGGTCGACGAATTAGTCTTGATGGAAAGCAGTAT                          | This work |
| 1428          | lytCUR EagI    | CTCCTCGGCCGAAGCTGTTGGCACAAAAAGTATGAG                           | This work |
| 1425          | lytCDF EagI    | AGGAGCGGCCGCATCAGATGCAAGTAAATTGAAGCA                           | This work |
| 1426          | lytCDR BamHI   | ctcctggatcccatgattgtttgtaataacttggcat                          | This work |
| 1429          | lytDUR EagI    | AGGAGCGGCCGAAAAAAGTTAGAAAAGTTGCAAATAG<br>GCT                   | This work |
| 1430          | lytDUF Sall    | CTCCTGTGCGACTTGATATGAAGAATAGACAGTTGGCA                         | This work |
| 1431          | lytDDR BamHI   | AGGAGGGATCCAGTATTCCTTCAGAATCAACGGGGGA<br>AT                    | This work |
| 1432          | lytDDF EagI    | CTCCTCGGCCGTTAGTCTCTTTTTTCATTCTTCTCCTC<br>TT                   | This work |
| 695           | IPCR1          | GCTTGTAATTCTATCATAATTG                                         | This work |
| 696           | IPCR2          | AGGGAATCATTGGAAGGTTGG                                          | This work |
|               |                |                                                                |           |
| Plasmids      |                | Genotype                                                       | Reference |
| pDP299        |                | <i>ΔlytC ori<sup>TsBs</sup> mls amp</i>                        | This work |
| pDP300        |                | <i>ΔlytD ori<sup>TsBs</sup> mls amp</i>                        | This work |
| pMiniMAD      |                | <i>ori<sup>TsBs</sup> mls amp</i>                              | [59]      |
| pDR244        |                | <i>ori<sup>Ts</sup>, cre constitutively expressed, amp/spc</i> | [14]      |

744 **References**

745

- 746 1. Boutilier, R.G. (2001). Mechanisms of cell survival in hypoxia and hypothermia. *J Exp*  
747 *Biol* *204*, 3171-3181.
- 748 2. Hochachka, P.W. (1986). Defense strategies against hypoxia and hypothermia.  
749 *Science* *231*, 234-241.
- 750 3. Sendoel, A., and Hengartner, M.O. (2014). Apoptotic cell death under hypoxia.  
751 *Physiology (Bethesda)* *29*, 168-176.
- 752 4. Prescott, L.M., Harley, J.P., and Klein, D.A. (2005). *Microbiology*, 6th Edition,  
753 (Dubuque, IA: McGraw-Hill Higher Education).
- 754 5. Wayne, L.G., and Hayes, L.G. (1996). An in vitro model for sequential study of  
755 shiftdown of *Mycobacterium tuberculosis* through two stages of nonreplicating  
756 persistence. *Infect Immun* *64*, 2062-2069.
- 757 6. Rao, S.P., Alonso, S., Rand, L., Dick, T., and Pethe, K. (2008). The protonmotive force  
758 is required for maintaining ATP homeostasis and viability of hypoxic, nonreplicating  
759 *Mycobacterium tuberculosis*. *Proc Natl Acad Sci U S A* *105*, 11945-11950.
- 760 7. Berney, M., Greening, C., Conrad, R., Jacobs, W.R., Jr., and Cook, G.M. (2014). An  
761 obligately aerobic soil bacterium activates fermentative hydrogen production to  
762 survive reductive stress during hypoxia. *Proc Natl Acad Sci U S A* *111*, 11479-11484.
- 763 8. O'Toole, R., Smeulders, M.J., Blokpoel, M.C., Kay, E.J., Loughheed, K., and Williams, H.D.  
764 (2003). A two-component regulator of universal stress protein expression and  
765 adaptation to oxygen starvation in *Mycobacterium smegmatis*. *J Bacteriol* *185*, 1543-  
766 1554.

- 767 9. Nakano, M.M., Dailly, Y.P., Zuber, P., and Clark, D.P. (1997). Characterization of  
768 anaerobic fermentative growth of *Bacillus subtilis*: identification of fermentation end  
769 products and genes required for growth. *J Bacteriol* 179, 6749-6755.
- 770 10. Pusey, P.L., and Wilson, C.L. (1984). Postharvest biological control of stone fruit  
771 brown rot by *Bacillus subtilis*. *Plant Disease* 68, 753-756.
- 772 11. Kumar, A.S., Lakshmanan, V., Caplan, J.L., Powell, D., Czymmek, K.J., Levia, D.F., and  
773 Bais, H.P. (2012). Rhizobacteria *Bacillus subtilis* restricts foliar pathogen entry  
774 through stomata. *The Plant Journal* 72, 694-706.
- 775 12. Sierra, J., and Renault, P. (1998). Temporal Pattern of Oxygen Concentration in a  
776 Hydromorphic Soil. *Soil Science Society of America Journal* 62, 1398-1405.
- 777 13. Kaufman, W., and Bauer, K. (1958). Some studies of the mechanism of the " anaerobic  
778 autolysis" of *Bacillus subtilis* *J. Gen. Microbiol.* 18.
- 779 14. Koo, B.M., Kritikos, G., Farelli, J.D., Todor, H., Tong, K., Kimsey, H., Wapinski, I.,  
780 Galardini, M., Cabal, A., Peters, J.M., et al. (2017). Construction and Analysis of Two  
781 Genome-Scale Deletion Libraries for *Bacillus subtilis*. *Cell Syst* 4, 291-305 e297.
- 782 15. Peters, J.M., Colavin, A., Shi, H., Czarny, T.L., Larson, M.H., Wong, S., Hawkins, J.S., Lu,  
783 C.H.S., Koo, B.M., Marta, E., et al. (2016). A Comprehensive, CRISPR-based Functional  
784 Analysis of Essential Genes in Bacteria. *Cell* 165, 1493-1506.
- 785 16. Zhu, B., and Stulke, J. (2018). SubtiWiki in 2018: from genes and proteins to  
786 functional network annotation of the model organism *Bacillus subtilis*. *Nucleic Acids*  
787 *Res* 46, D743-D748.

- 788 17. Zeigler, D.R., Pragai, Z., Rodriguez, S., Chevreux, B., Muffler, A., Albert, T., Bai, R.,  
789 Wyss, M., and Perkins, J.B. (2008). The origins of 168, W23, and other *Bacillus*  
790 *subtilis* legacy strains. *J Bacteriol* *190*, 6983-6995.
- 791 18. Julkowska, D., Obuchowski, M., Holland, I.B., and Seror, S.J. (2005). Comparative  
792 analysis of the development of swarming communities of *Bacillus subtilis* 168 and a  
793 natural wild type: critical effects of surfactin and the composition of the medium. *J*  
794 *Bacteriol* *187*, 65-76.
- 795 19. Nakano, M.M., Corbell, N., Besson, J., and Zuber, P. (1992). Isolation and  
796 characterization of *sfp*: a gene that functions in the production of the lipopeptide  
797 biosurfactant, surfactin, in *Bacillus subtilis*. *Mol Gen Genet* *232*, 313-321.
- 798 20. Nakano, M.M., Marahiel, M.A., and Zuber, P. (1988). Identification of a genetic locus  
799 required for biosynthesis of the lipopeptide antibiotic surfactin in *Bacillus subtilis*. *J*  
800 *Bacteriol* *170*, 5662-5668.
- 801 21. Arima, K., Kakinuma, A., and Tamura, G. (1968). Surfactin, a crystalline peptidolipid  
802 surfactant produced by *Bacillus subtilis*: isolation, characterization and its inhibition  
803 of fibrin clot formation. *Biochem Biophys Res Commun* *31*, 488-494.
- 804 22. Płaza, G.A., Turek, A., Król, E., and Szczygłowska, R. (2013). Antifungal and  
805 antibacterial properties of surfactin isolated from *Bacillus subtilis* growing on  
806 molasses. *African Journal of Microbiology Research* *7*, 3165-3170.
- 807 23. Korenblum, E., de Araujo, L.V., Guimaraes, C.R., de Souza, L.M., Sasaki, G., Abreu, F.,  
808 Nitschke, M., Lins, U., Freire, D.M., Barreto-Bergter, E., et al. (2012). Purification and  
809 characterization of a surfactin-like molecule produced by *Bacillus sp. H20-1* and its  
810 antagonistic effect against sulfate reducing bacteria. *BMC Microbiol* *12*, 252.

- 811 24. Rosenberg, G., Steinberg, N., Oppenheimer-Shaanan, Y., Olender, T., Doron, S., Ben-  
812 Ari, J., Sirota-Madi, A., Bloom-Ackermann, Z., and Kolodkin-Gal, I. (2016). Not so  
813 simple, not so subtle: the interspecies competition between *Bacillus simplex* and  
814 *Bacillus subtilis* and its impact on the evolution of biofilms. NPJ Biofilms  
815 Microbiomes 2, 15027.
- 816 25. Snook, M.E., Mitchell, T., Hinton, D.M., and Bacon, C.W. (2009). Isolation and  
817 characterization of leu7-surfactin from the endophytic bacterium *Bacillus*  
818 *mojavensis* RRC 101, a biocontrol agent for *Fusarium verticillioides*. J Agric Food  
819 Chem 57, 4287-4292.
- 820 26. Zhi, Y., Wu, Q., Du, H., and Xu, Y. (2016). Biocontrol of geosmin-producing  
821 *Streptomyces* spp. by two *Bacillus* strains from Chinese liquor. Int J Food Microbiol  
822 231, 1-9.
- 823 27. Olmeda, B., Villen, L., Cruz, A., Orellana, G., and Perez-Gil, J. (2010). Pulmonary  
824 surfactant layers accelerate O<sub>2</sub> diffusion through the air-water interface. Biochim  
825 Biophys Acta 1798, 1281-1284.
- 826 28. Cabeen, M.T., and Jacobs-Wagner, C. (2005). Bacterial cell shape. Nat Rev Microbiol  
827 3, 601-610.
- 828 29. Lazarevic, V., Margot, P., Soldo, B., and Karamata, D. (1992). Sequencing and analysis  
829 of the *Bacillus subtilis* *lytRABC* divergon: a regulatory unit encompassing the  
830 structural genes of the N-acetylmuramoyl-L-alanine amidase and its modifier. J Gen  
831 Microbiol 138, 1949-1961.

- 832 30. Margot, P., Mauel, C., and Karamata, D. (1994). The gene of the N-  
833 acetylglucosaminidase, a *Bacillus subtilis* 168 cell wall hydrolase not involved in  
834 vegetative cell autolysis. *Mol Microbiol* 12, 535-545.
- 835 31. Koch, A.L. (2001). Autolysis control hypotheses for tolerance to wall antibiotics.  
836 *Antimicrob Agents Chemother* 45, 2671-2675.
- 837 32. Sheppard, J.D., Jumarie, C., Cooper, D.G., and Laprade, R. (1991). Ionic channels  
838 induced by surfactin in planar lipid bilayer membranes. *Biochim Biophys Acta* 1064,  
839 13-23.
- 840 33. Laidig, K.E., Gainer, J.L., and Daggett, V. (1998). Altering Diffusivity in Biological  
841 Solutions through Modification of Solution Structure and Dynamics. *J Am Chem Soc*  
842 120, 9394-9395.
- 843 34. Hotez, L., Dailey, J.W., Geelhoed, G.W., and Gainer, J.L. (1977). The role of oxygen  
844 diffusivity in biochemical reactions. *Experientia* 33, 1424-1425.
- 845 35. Cosmina, P., Rodriguez, F., de Ferra, F., Grandi, G., Perego, M., Venema, G., and van  
846 Sinderen, D. (1993). Sequence and analysis of the genetic locus responsible for  
847 surfactin synthesis in *Bacillus subtilis*. *Mol Microbiol* 8, 821-831.
- 848 36. Nakano, M.M., Xia, L.A., and Zuber, P. (1991). Transcription initiation region of the  
849 *urfA* operon, which is controlled by the *comP-comA* signal transduction system in  
850 *Bacillus subtilis*. *J Bacteriol* 173, 5487-5493.
- 851 37. Hayashi, K., Kensuke, T., Kobayashi, K., Ogasawara, N., and Ogura, M. (2006). *Bacillus*  
852 *subtilis* RghR (YvaN) represses *rapG* and *rapH*, which encode inhibitors of  
853 expression of the *urfA* operon. *Mol Microbiol* 59, 1714-1729.

- 854 38. Mukherjee, S., and Kearns, D.B. (2014). The structure and regulation of flagella in  
855 *Bacillus subtilis*. *Annu Rev Genet* 48, 319-340.
- 856 39. Ueno, T., Oosawa, K., and Aizawa, S. (1992). M ring, S ring and proximal rod of the  
857 flagellar basal body of *Salmonella typhimurium* are composed of subunits of a single  
858 protein, FliF. *J Mol Biol* 227, 672-677.
- 859 40. Evans, L.D., Stafford, G.P., Ahmed, S., Fraser, G.M., and Hughes, C. (2006). An escort  
860 mechanism for cycling of export chaperones during flagellum assembly. *Proc Natl*  
861 *Acad Sci U S A* 103, 17474-17479.
- 862 41. Minamino, T., Chu, R., Yamaguchi, S., and Macnab, R.M. (2000). Role of FliJ in flagellar  
863 protein export in *Salmonella*. *J Bacteriol* 182, 4207-4215.
- 864 42. Farha, M.A., Verschoor, C.P., Bowdish, D., and Brown, E.D. (2013). Collapsing the  
865 proton motive force to identify synergistic combinations against *Staphylococcus*  
866 *aureus*. *Chem Biol* 20, 1168-1178.
- 867 43. Prindle, A., Liu, J., Asally, M., Ly, S., Garcia-Ojalvo, J., and Suel, G.M. (2015). Ion  
868 channels enable electrical communication in bacterial communities. *Nature* 527, 59-  
869 63.
- 870 44. Varma, S., Sabo, D., and Rempe, S.B. (2008). K<sup>+</sup>/Na<sup>+</sup> selectivity in K channels and  
871 valinomycin: over-coordination versus cavity-size constraints. *J Mol Biol* 376, 13-22.
- 872 45. Strahl, H., Burmann, F., and Hamoen, L.W. (2014). The actin homologue MreB  
873 organizes the bacterial cell membrane. *Nat Commun* 5, 3442.
- 874 46. Branda, S.S., Gonzalez-Pastor, J.E., Ben-Yehuda, S., Losick, R., and Kolter, R. (2001).  
875 Fruiting body formation by *Bacillus subtilis*. *Proc Natl Acad Sci U S A* 98, 11621-  
876 11626.



- 877 47. Pham, J.V., Yilma, M.A., Feliz, A., Majid, M.T., Maffetone, N., Walker, J.R., Kim, E., Cho,  
878 H.J., Reynolds, J.M., Song, M.C., et al. (2019). A Review of the Microbial Production of  
879 Bioactive Natural Products and Biologics. *Front Microbiol* 10, 1404.
- 880 48. Hu, J., Lei, P., Mohsin, A., Liu, X., Huang, M., Li, L., Hu, J., Hang, H., Zhuang, Y., and Guo,  
881 M. (2017). Mixomics analysis of *Bacillus subtilis*: effect of oxygen availability on  
882 riboflavin production. *Microb Cell Fact* 16, 150.
- 883 49. Garcia-Ochoa, F., and Gomez, E. (2009). Bioreactor scale-up and oxygen transfer rate  
884 in microbial processes: an overview. *Biotechnol Adv* 27, 153-176.
- 885 50. Baeshen, N.A., Baeshen, M.N., Sheikh, A., Bora, R.S., Ahmed, M.M., Ramadan, H.A.,  
886 Saini, K.S., and Redwan, E.M. (2014). Cell factories for insulin production. *Microb*  
887 *Cell Fact* 13, 141.
- 888 51. Arjes, H.A., Kriel, A., Sorto, N.A., Shaw, J.T., Wang, J.D., and Levin, P.A. (2014). Failsafe  
889 mechanisms couple division and DNA replication in bacteria. *Curr Biol* 24, 2149-  
890 2155.
- 891 52. Rojas, E.R., Huang, K.C., and Theriot, J.A. (2017). Homeostatic Cell Growth Is  
892 Accomplished Mechanically through Membrane Tension Inhibition of Cell-Wall  
893 Synthesis. *Cell Syst* 5, 578-590 e576.
- 894 53. Blackman, S.A., Smith, T.J., and Foster, S.J. (1998). The role of autolysins during  
895 vegetative growth of *Bacillus subtilis* 168. *Microbiology* 144 ( Pt 1), 73-82.
- 896 54. Calamita, H.G., Ehringer, W.D., Koch, A.L., and Doyle, R.J. (2001). Evidence that the  
897 cell wall of *Bacillus subtilis* is protonated during respiration. *Proc Natl Acad Sci U S*  
898 *A* 98, 15260-15263.

- 899 55. Mueller, E.A., Egan, A.J., Breukink, E., Vollmer, W., and Levin, P.A. (2019). Plasticity of  
900 *Escherichia coli* cell wall metabolism promotes fitness and antibiotic resistance  
901 across environmental conditions. *Elife* 8.
- 902 56. Peters, K., Kannan, S., Rao, V.A., Biboy, J., Vollmer, D., Erickson, S.W., Lewis, R.J.,  
903 Young, K.D., and Vollmer, W. (2016). The Redundancy of Peptidoglycan  
904 Carboxypeptidases Ensures Robust Cell Shape Maintenance in *Escherichia coli*. *MBio*  
905 7.
- 906 57. Stratford, J.P., Edwards, C.L.A., Ghanshyam, M.J., Malyshev, D., Delise, M.A., Hayashi,  
907 Y., and Asally, M. (2019). Electrically induced bacterial membrane-potential  
908 dynamics correspond to cellular proliferation capacity. *Proc Natl Acad Sci U S A* 116,  
909 9552-9557.
- 910 58. Yasbin, R.E., and Young, F.E. (1974). Transduction in *Bacillus subtilis* by  
911 bacteriophage SPP1. *J Virol* 14, 1343-1348.
- 912 59. Patrick, J.E., and Kearns, D.B. (2008). MinJ (YvjD) is a topological determinant of cell  
913 division in *Bacillus subtilis*. *Mol Microbiol* 70, 1166-1179.
- 914 60. Arnaud, M., Chastanet, A., and Debarbouille, M. (2004). New vector for efficient  
915 allelic replacement in naturally nontransformable, low-GC-content, gram-positive  
916 bacteria. *Appl Environ Microbiol* 70, 6887-6891.
- 917 61. DeRosa, C.A., Samonina-Kosicka, J., Fan, Z., Hendargo, H.C., Weitzel, D.H., Palmer,  
918 G.M., and Fraser, C.L. (2015). Oxygen Sensing Difluoroboron Dinaphthoylemethane  
919 Polylactide. *Macromolecules* 48, 2967-2977.
- 920 62. DeRosa, C.A., Seaman, S.A., Mathew, A.S., Gorick, C.M., Fan, Z., Demas, J.N., Peirce,  
921 S.M., and Fraser, C.L. (2016). Oxygen Sensing Difluoroboron beta-Diketonate

922 Polylactide Materials with Tunable Dynamic Ranges for Wound Imaging. *ACS Sens* *1*,  
923 1366-1373.

924 63. Shi, H., Colavin, A., Lee, T.K., and Huang, K.C. (2017). Strain Library Imaging Protocol:  
925 high-throughput, automated single-cell microscopy for large bacterial collections  
926 arrayed on multiwell plates. *Nature Protocols*.

927 64. Kuru, E., Hughes, H.V., Brown, P.J., Hall, E., Tekkam, S., Cava, F., de Pedro, M.A., Brun,  
928 Y.V., and VanNieuwenhze, M.S. (2012). In Situ probing of newly synthesized  
929 peptidoglycan in live bacteria with fluorescent D-amino acids. *Angew Chem Int Ed*  
930 *Engl* *51*, 12519-12523.

931
